# Supplementary material for: Ammonia synthesis on BaTiO2.5H0.5: computational insights into the role of hydrides
Source: Royal Society of Chemistry journal article supplement (doi:10.1039/d1cp05055a), 2021-12-02
Supplement: d1cp05055a1.pdf [file d1cp05055a1.pdf]

*Electronic Supplementary Information*

## **Ammonia synthesis on BaTiO<sub>2.5</sub>H<sub>0.5</sub>: computational insights into the role of hydrides**

Kristen Wang,<sup>a</sup> Zili Wu,<sup>b,c</sup> De-en Jiang<sup>\*a</sup>

<sup>a</sup>Department of Chemistry, University of California, Riverside, CA 92521, USA

<sup>b</sup>Chemical Sciences Division, Oak Ridge National Laboratory, Oak Ridge, Tennessee 37831, United States

<sup>c</sup>Center for Nanophase Materials Sciences, Oak Ridge National Laboratory, Oak Ridge, Tennessee 37831, United States

\*To whom correspondence should be addressed. E-mail: [djiang@ucr.edu](mailto:djiang@ucr.edu)

### **1. Details of the thermodynamic calculations**

The change in Gibbs free energy corresponding to NH<sub>3</sub> desorption ( $\Delta G_{des}$ ) from the surface was approximated using the following equation

$$\Delta G_{des} = \Delta H_{des} - T\Delta S_{des} \approx (\Delta E_{elec} + \Delta E_{vib}) - T\Delta S_{des} \quad (S1)$$

where  $\Delta E_{elec}$  is the change in electronic energy,  $\Delta E_{vib}$  is the change in vibrational energy, T is temperature at 673 K, and  $\Delta S_{des}$  is the change in entropy between the adsorbed state (initial state) and the desorbed state (final state). In this work, we approximated that the rotational and vibrational entropic contributions are much less than the translational entropic contribution such that

$$\Delta S_{des} = S_{NH_3} - S_{NH_3^*} = S_{NH_3} - (S_{NH_3} - S_{NH_3,trans}) = S_{NH_3,trans} \quad (S2)$$

where  $S_{\text{NH}_3}$  is the total entropy of gaseous  $\text{NH}_3$ ,  $S_{\text{NH}_3^*}$  is the total entropy of adsorbed  $\text{NH}_3$ , and  $S_{\text{NH}_3,\text{trans}}$  is the translational entropy of gaseous  $\text{NH}_3$ . The equation used to calculate  $E_{\text{vib}}$  in equation S1 is

$$E_{\text{vib}} = \sum_i \left\{ \frac{h\nu_i}{2} + \frac{h\nu_i e^{-\frac{h\nu_i}{kT}}}{1 - e^{-\frac{h\nu_i}{kT}}} \right\} \quad (\text{S3})$$

where  $h$  is the Planck's constant,  $\nu_i$  is the vibrational frequency of mode  $i$ ,  $T$  is the temperature at 673 K, and  $k$  is the Boltzmann constant. The Sackur-Tetrode equation (see A. Savara, J. Phys. Chem. C, 2013, **117**, 15710–15715) was used to calculate  $S_{\text{NH}_3,\text{trans}}$  which approximately equals to  $\Delta S_{\text{des}}$

$$\Delta S_{\text{des}} \approx S_{\text{NH}_3,\text{trans}} = R \ln \left( \left( \frac{\sqrt{2\pi m k T}}{h} \right)^D \frac{L^D}{n N_A} \right) + \left( 1 + \frac{D}{2} \right) R \quad (\text{S4})$$

where  $R$  is the ideal gas constant,  $m$  is the molecular mass of  $\text{NH}_3$ ,  $D$  is the number of dimensions  $\text{NH}_3$  gas is confined to,  $L$  is the length of the box  $\text{NH}_3$  is confined to,  $n$  is the total number of moles, and  $N_A$  is Avogadro's number. In this work,  $D = 3$  such that  $L^D$  gives the volume of the box in which  $\text{NH}_3$  is confined. The value of  $L$  was calculated by first solving for the volume ( $V$ ) of the box using the ideal gas equation ( $PV = nRT$ ), where  $P = 1$  bar, and then taking the cube root of  $V$ . The value of  $n$  was set to 1.

## 2. Surface slab

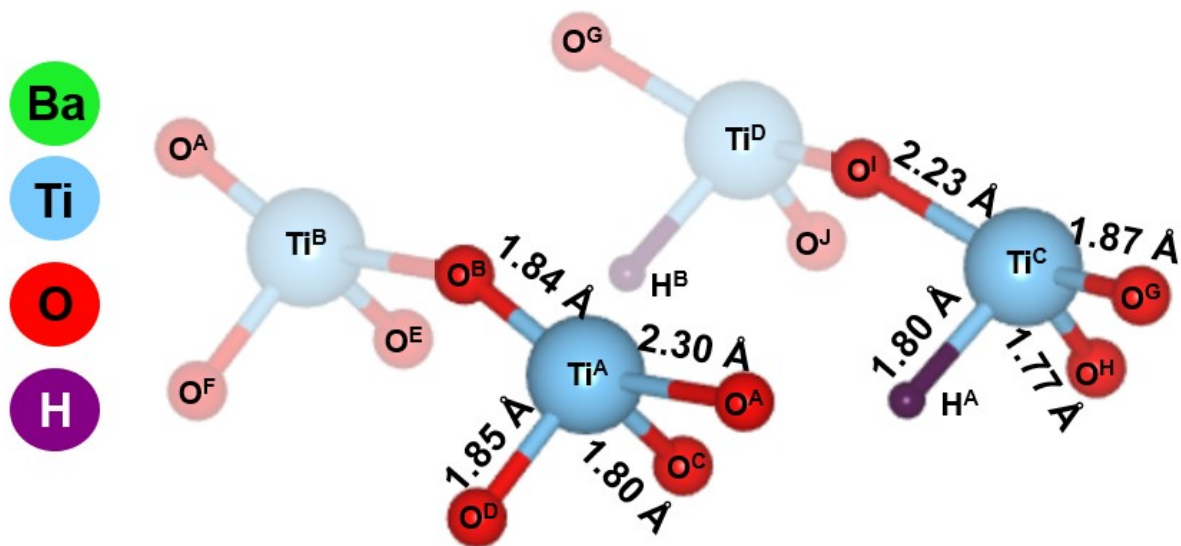

Fig. S1. The bond lengths between surface and subsurface atoms of the BTOH (210)-Ti<sub>2</sub>O<sub>2</sub> surface. Since the slab model is a 2×2 supercell, the distances between atoms of the faded region are the same as the distances between atoms of the unfaded region.

### 3. H<sub>2</sub> dissociation over the (210)-Ti<sub>2</sub>O<sub>2</sub> surface termination of BTOH

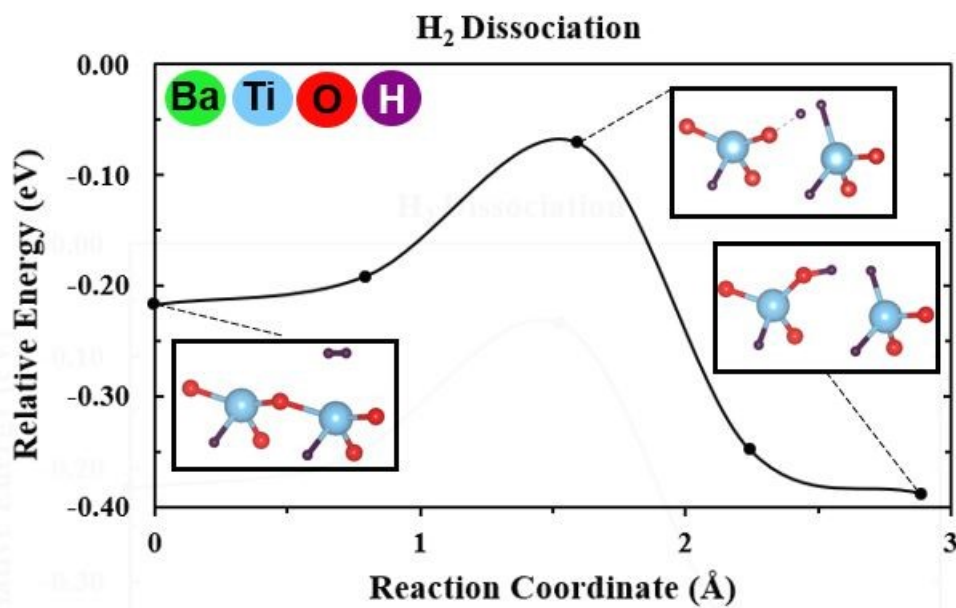

Fig. S2. Minimum energy path of  $H_2$  dissociation across the surface  $Ti^C-O$  bond and the structures for the initial, transition, and final states.

#### 4. $N_2$ dissociation over the (210)- $Ti_2O_2$ surface termination of BTOH

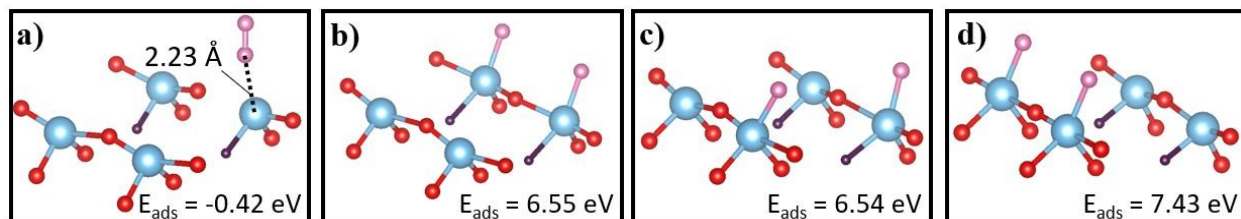

Fig. S3. The structures of  $N_2$  adsorbed on a surface Ti site (a) and of dissociated  $N_2$  adsorbed on different surface Ti sites (b)-(d). The adsorption energies are listed on the bottom of each panel.

## 5. Comparison of the two \*NNH intermediates on the BTOH (210)-Ti<sub>2</sub>O<sub>2</sub> surface

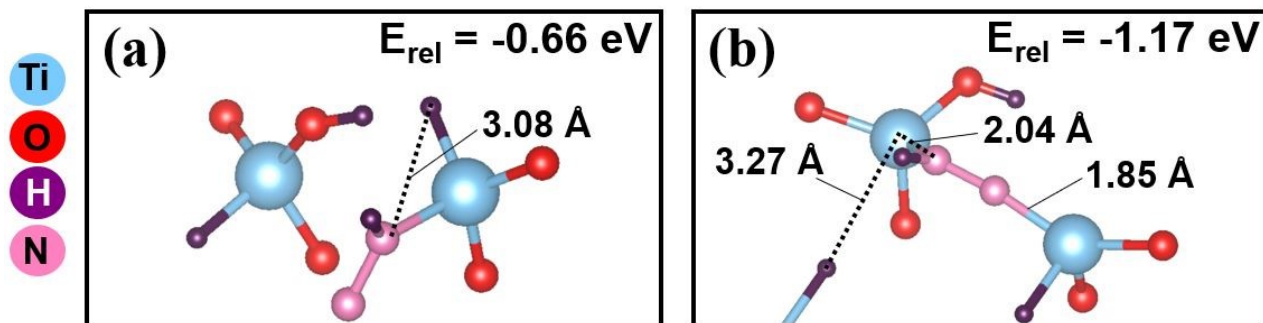

Fig. S4. Comparison of the two \*NNH intermediates: (a) state 5 in the distal pathway (Fig. 5 in the main text), formed from reaction with a subsurface lattice hydride and adsorbed at the subsurface anion vacancy; (b) state 5 in the alternating pathway (Fig. 7 in the main text), formed from reaction with a surface hydride (from H<sub>2</sub> dissociation) and adsorbed on a surface Ti site.

## 6. Comparison of the distal and alternating pathways

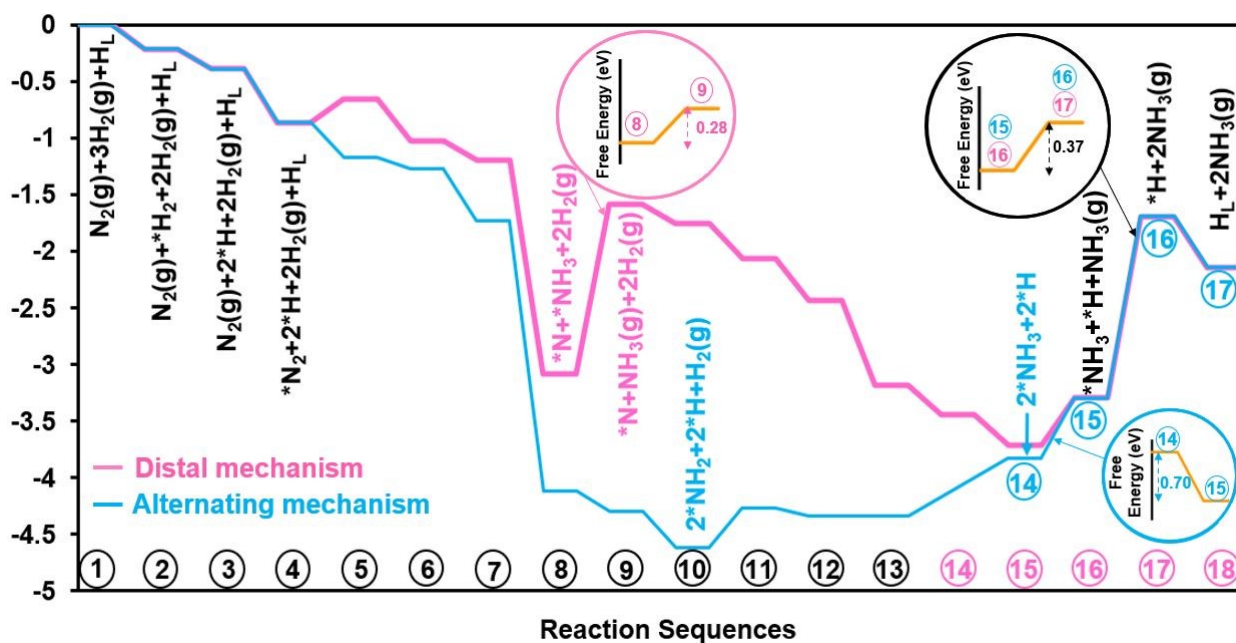

Fig. S5. Comparison of the energy profiles of the distal and alternating pathways. The intermediate states shared by the two pathways are labeled in black (in the beginning and the end).

## 7. Optimized geometries of intermediate states

This section lists the optimized geometries, in fractional coordinates, of all the intermediate states in both the distal and alternating mechanisms.

### Distal mechanism: Clean (210)-Ti<sub>2</sub>O<sub>2</sub> slab (state 1)

```
1.0000000000000000
 8.0600004195999997 0.0000000000000000 0.0000000000000000
 0.0000000000000000 11.3985996245999992 0.0000000000000000
 0.0000000000000000 0.0000000000000000 22.2077999115000004
Ba Ti O H
 8 12 30 6
Selective dynamics
Direct
0.0000000000000000 0.5000000000000000 0.0659599990000004 F F F
-0.0037941018790552 0.2540606864726686 0.1916155876061243 T T T
0.0000000000000000 0.0000000000000000 0.0659599990000004 F F F
-0.0004860342675610 0.7526339353338757 0.1896787239691944 T T T
0.5000000000000000 0.5000000000000000 0.0659599990000004 F F F
0.4962035717866282 0.2540583136029386 0.1916205646485058 T T T
0.5000000000000000 0.0000000000000000 0.0659599990000004 F F F
0.4995281703854711 0.7526243079003427 0.1896722240729709 T T T
0.2500000000000000 0.7461800230000009 0.0640000009999966 F F F
0.2387663565448006 0.4979077342512243 0.1872266022980883 T T T
0.2425039197184942 0.2595171522590658 0.3110385107113783 T T T
0.2500000000000000 0.2538199979999973 0.0679299979999968 F F F
0.2362552519436495 0.0152996018456535 0.1949679811848715 T T T
0.2588895348861243 0.7663364173385725 0.3133268454212547 T T T
0.7499999699999975 0.7461800230000009 0.0640000009999966 F F F
0.7387491694409042 0.4979172824879614 0.1872357451962299 T T T
0.7424986168328238 0.2595068703590096 0.3110191539519677 T T T
0.7499999699999975 0.2538199979999973 0.0679299979999968 F F F
0.7361967811861203 0.0153085203986151 0.1949670348738222 T T T
0.7588494679733415 0.7663238258611598 0.3133253035105685 T T T
0.2500000000000000 0.6249999790000018 0.0018099999999990 F F F
0.2500000000000000 0.3750000209999982 0.1301199910000008 F F F
0.2537458919156796 0.1354449082459454 0.2571787210391976 T T T
0.2500000000000000 0.8785200129999993 0.0036100000000019 F F F
0.2500000000000000 0.6285200129999993 0.1319299930000000 F F F
0.2553545864038563 0.3781459720282377 0.2577001871959758 T T T
0.0000000000000000 0.7535200339999975 0.0677699969999992 F F F
0.0071465258987316 0.5056520981944754 0.1948280942160031 T T T
0.0217036861041920 0.2576589148457055 0.3319278611791088 T T T
0.2500000000000000 0.3714799870000007 0.0000000000000000 F F F
0.2500000000000000 0.1214800070000024 0.1283199940000017 F F F
0.2512342158579459 0.8710635000798473 0.2543493060805284 T T T
0.0000000000000000 0.2464800070000024 0.0641599969999973 F F F
0.0078597356000254 -0.0007881115983847 0.1907755395110892 T T T
-0.0141795131270909 0.7515941404303713 0.3284988280085817 T T T
0.7499999699999975 0.6249999790000018 0.0018099999999990 F F F
0.7499999699999975 0.3750000209999982 0.1301199910000008 F F F
0.7537430186810440 0.1354628305842427 0.2571850052113361 T T T
```

|                    |                     |                    |   |   |   |
|--------------------|---------------------|--------------------|---|---|---|
| 0.7499999699999975 | 0.8785200129999993  | 0.0036100000000019 | F | F | F |
| 0.7499999699999975 | 0.6285200129999993  | 0.1319299930000000 | F | F | F |
| 0.7553797480987494 | 0.3781222597755282  | 0.2577137251120341 | T | T | T |
| 0.5000000000000000 | 0.7535200339999975  | 0.0677699969999992 | F | F | F |
| 0.5071131107802491 | 0.5056542086981535  | 0.1948231007986609 | T | T | T |
| 0.5217428690408586 | 0.2576834338155312  | 0.3319238736027079 | T | T | T |
| 0.7499999699999975 | 0.3714799870000007  | 0.0000000000000000 | F | F | F |
| 0.7499999699999975 | 0.1214800070000024  | 0.1283199940000017 | F | F | F |
| 0.7511917036286804 | 0.8710528300725885  | 0.2543435584068292 | T | T | T |
| 0.5000000000000000 | 0.2464800070000024  | 0.0641599969999973 | F | F | F |
| 0.5079586851675603 | -0.0007987470493617 | 0.1907738107506634 | T | T | T |
| 0.4858093714192371 | 0.7516084369162140  | 0.3285010125296250 | T | T | T |
| 0.2500000000000000 | 0.1250000000000000  | 0.0018099999999990 | F | F | F |
| 0.2500000000000000 | 0.8750000209999982  | 0.1301199910000008 | F | F | F |
| 0.2513855845780597 | 0.6452454026534463  | 0.2616531990464892 | T | T | T |
| 0.7499999699999975 | 0.1250000000000000  | 0.0018099999999990 | F | F | F |
| 0.7499999699999975 | 0.8750000209999982  | 0.1301199910000008 | F | F | F |
| 0.7513591988699516 | 0.6452194648731273  | 0.2616224422247638 | T | T | T |

**Distal mechanism (state 2)**

|                    |                     |                     |  |  |  |
|--------------------|---------------------|---------------------|--|--|--|
| 1.0000000000000000 |                     |                     |  |  |  |
| 8.0600004195999997 | 0.0000000000000000  | 0.0000000000000000  |  |  |  |
| 0.0000000000000000 | 11.3985996245999992 | 0.0000000000000000  |  |  |  |
| 0.0000000000000000 | 0.0000000000000000  | 22.2077999115000004 |  |  |  |

Ba Ti O H  
8 12 30 8

Selective dynamics

Direct

|                     |                    |                    |   |   |   |
|---------------------|--------------------|--------------------|---|---|---|
| 0.0000000000000000  | 0.5000000000000000 | 0.0659599990000004 | F | F | F |
| 0.9965740453520884  | 0.2543621784481268 | 0.1915456226096471 | T | T | T |
| 0.0000000000000000  | 0.0000000000000000 | 0.0659599990000004 | F | F | F |
| -0.0009226754655153 | 0.7523826041335686 | 0.1888854309801535 | T | T | T |
| 0.5000000000000000  | 0.5000000000000000 | 0.0659599990000004 | F | F | F |
| 0.4960739858479422  | 0.2540549972918659 | 0.1916613189108332 | T | T | T |
| 0.5000000000000000  | 0.0000000000000000 | 0.0659599990000004 | F | F | F |
| 0.5003540509422978  | 0.7525367760168660 | 0.1900860673256533 | T | T | T |
| 0.2500000000000000  | 0.7461800230000009 | 0.0640000009999966 | F | F | F |
| 0.2386699377978337  | 0.4984098952111142 | 0.1872976085424679 | T | T | T |
| 0.2424473051523427  | 0.2590701283757699 | 0.3111193559688526 | T | T | T |
| 0.2500000000000000  | 0.2538199979999973 | 0.0679299979999968 | F | F | F |
| 0.2357745309731908  | 0.0147342630060019 | 0.1950465551088426 | T | T | T |
| 0.2538519769293922  | 0.7632766409182135 | 0.3115131829198062 | T | T | T |
| 0.7499999699999975  | 0.7461800230000009 | 0.0640000009999966 | F | F | F |
| 0.7388011905816207  | 0.4980014227474382 | 0.1873107719688158 | T | T | T |
| 0.7431334743018072  | 0.2592384391957215 | 0.3110802172999501 | T | T | T |
| 0.7499999699999975  | 0.2538199979999973 | 0.0679299979999968 | F | F | F |
| 0.7370104928211816  | 0.0155897145946062 | 0.1949058210032288 | T | T | T |
| 0.7633909409655063  | 0.7632557810289397 | 0.3137901565302872 | T | T | T |
| 0.2500000000000000  | 0.6249999790000018 | 0.0018099999999990 | F | F | F |
| 0.2500000000000000  | 0.3750000209999982 | 0.1301199910000008 | F | F | F |
| 0.2536205764571113  | 0.1348978918764893 | 0.2573424283627577 | T | T | T |
| 0.2500000000000000  | 0.8785200129999993 | 0.0036100000000019 | F | F | F |
| 0.2500000000000000  | 0.6285200129999993 | 0.1319299930000000 | F | F | F |

|                    |                     |                    |   |   |   |
|--------------------|---------------------|--------------------|---|---|---|
| 0.2550290124318941 | 0.3776219626597073  | 0.2578624888650326 | T | T | T |
| 0.0000000000000000 | 0.7535200339999975  | 0.0677699969999992 | F | F | F |
| 0.0070595410893039 | 0.5054498503526816  | 0.1946859283427191 | T | T | T |
| 0.0215150608372646 | 0.2573387746495172  | 0.3322689963621423 | T | T | T |
| 0.2500000000000000 | 0.3714799870000007  | 0.0000000000000000 | F | F | F |
| 0.2500000000000000 | 0.1214800070000024  | 0.1283199940000017 | F | F | F |
| 0.2505171655287369 | 0.8701946961145585  | 0.2530743002429523 | T | T | T |
| 0.0000000000000000 | 0.2464800070000024  | 0.0641599969999973 | F | F | F |
| 0.0071455446624335 | -0.0007277362411175 | 0.1907510164354890 | T | T | T |
| 0.9944487634469815 | 0.7478144265621055  | 0.3272014406799146 | T | T | T |
| 0.7499999699999975 | 0.6249999790000018  | 0.0018099999999990 | F | F | F |
| 0.7499999699999975 | 0.3750000209999982  | 0.1301199910000008 | F | F | F |
| 0.7542555564082485 | 0.1352014185541976  | 0.2572559680882916 | T | T | T |
| 0.7499999699999975 | 0.8785200129999993  | 0.0036100000000019 | F | F | F |
| 0.7499999699999975 | 0.6285200129999993  | 0.1319299930000000 | F | F | F |
| 0.7555751218551385 | 0.3779272934032558  | 0.2578099565626562 | T | T | T |
| 0.5000000000000000 | 0.7535200339999975  | 0.0677699969999992 | F | F | F |
| 0.5072664677953953 | 0.5052973843091217  | 0.1948227127025947 | T | T | T |
| 0.5223358201919077 | 0.2572946048592877  | 0.3322205578626904 | T | T | T |
| 0.7499999699999975 | 0.3714799870000007  | 0.0000000000000000 | F | F | F |
| 0.7499999699999975 | 0.1214800070000024  | 0.1283199940000017 | F | F | F |
| 0.7525548530999807 | 0.8695619790024883  | 0.2559665847540925 | T | T | T |
| 0.5000000000000000 | 0.2464800070000024  | 0.0641599969999973 | F | F | F |
| 0.5089214593934360 | -0.0011924130591189 | 0.1909343396635029 | T | T | T |
| 0.4783912112165239 | 0.7470987196795917  | 0.3280284588518651 | T | T | T |
| 0.2500000000000000 | 0.1250000000000000  | 0.0018099999999990 | F | F | F |
| 0.2500000000000000 | 0.8750000209999982  | 0.1301199910000008 | F | F | F |
| 0.2492315592112157 | 0.6429178873922355  | 0.2590507307744782 | T | T | T |
| 0.7499999699999975 | 0.1250000000000000  | 0.0018099999999990 | F | F | F |
| 0.7499999699999975 | 0.8750000209999982  | 0.1301199910000008 | F | F | F |
| 0.7526617515663372 | 0.6429905818081346  | 0.2612897670839913 | T | T | T |
| 0.7801587679805295 | 0.7832997095097055  | 0.4141719397275329 | T | T | T |
| 0.6856757221430317 | 0.7831980620845672  | 0.4097347493964760 | T | T | T |

**Distal mechanism (state 3)**

|                    |                     |                     |
|--------------------|---------------------|---------------------|
| 1.0000000000000000 |                     |                     |
| 8.0600004195999997 | 0.0000000000000000  | 0.0000000000000000  |
| 0.0000000000000000 | 11.3985996245999992 | 0.0000000000000000  |
| 0.0000000000000000 | 0.0000000000000000  | 22.2077999115000004 |

Ba Ti O H  
8 12 30 8

Selective dynamics

Direct

|                     |                    |                    |   |   |   |
|---------------------|--------------------|--------------------|---|---|---|
| 0.0000000000000000  | 0.5000000000000000 | 0.0659599990000004 | F | F | F |
| 0.9969423114919864  | 0.2535856863462506 | 0.1914800945673623 | T | T | T |
| 0.0000000000000000  | 0.0000000000000000 | 0.0659599990000004 | F | F | F |
| -0.0013171989282641 | 0.7517225738225650 | 0.1862867612498650 | T | T | T |
| 0.5000000000000000  | 0.5000000000000000 | 0.0659599990000004 | F | F | F |
| 0.4957531187175336  | 0.2536215416692721 | 0.1916101602707549 | T | T | T |
| 0.5000000000000000  | 0.0000000000000000 | 0.0659599990000004 | F | F | F |
| 0.5007569018888648  | 0.7521904085439918 | 0.1886973831998753 | T | T | T |
| 0.2500000000000000  | 0.7461800230000009 | 0.0640000009999966 | F | F | F |
| 0.2388054658619986  | 0.4972179145593740 | 0.1874839156402523 | T | T | T |



|                    |                     |                    |   |   |   |
|--------------------|---------------------|--------------------|---|---|---|
| 0.2421968243049863 | 0.2593228530326684  | 0.3111156315380919 | T | T | T |
| 0.2500000000000000 | 0.2538199979999973  | 0.0679299979999968 | F | F | F |
| 0.2369663939470814 | 0.0150182668268876  | 0.1952022281264343 | T | T | T |
| 0.2288002290153552 | 0.7657215688269753  | 0.3132882207224859 | T | T | T |
| 0.7499999699999975 | 0.7461800230000009  | 0.0640000009999966 | F | F | F |
| 0.7389871163979798 | 0.4959982003011204  | 0.1873367005559465 | T | T | T |
| 0.7428196444680949 | 0.2596595984223511  | 0.3110403914990709 | T | T | T |
| 0.7499999699999975 | 0.2538199979999973  | 0.0679299979999968 | F | F | F |
| 0.7368956273221292 | 0.0161767689090269  | 0.1950489296826381 | T | T | T |
| 0.7833844026274274 | 0.7756336062325353  | 0.3173939407066363 | T | T | T |
| 0.2500000000000000 | 0.6249999790000018  | 0.0018099999999990 | F | F | F |
| 0.2500000000000000 | 0.3750000209999982  | 0.1301199910000008 | F | F | F |
| 0.2536684419377983 | 0.1350672036286786  | 0.2571577484000654 | T | T | T |
| 0.2500000000000000 | 0.8785200129999993  | 0.0036100000000019 | F | F | F |
| 0.2500000000000000 | 0.6285200129999993  | 0.1319299930000000 | F | F | F |
| 0.2549203658792005 | 0.3775521054852445  | 0.2573587498854356 | T | T | T |
| 0.0000000000000000 | 0.7535200339999975  | 0.0677699969999992 | F | F | F |
| 0.0065430321455476 | 0.5068462376391331  | 0.1952440281340275 | T | T | T |
| 0.0214894523711164 | 0.2575667161948751  | 0.3313284142875271 | T | T | T |
| 0.2500000000000000 | 0.3714799870000007  | 0.0000000000000000 | F | F | F |
| 0.2500000000000000 | 0.1214800070000024  | 0.1283199940000017 | F | F | F |
| 0.2573635312441497 | 0.8705430669785998  | 0.2546481276806147 | T | T | T |
| 0.0000000000000000 | 0.2464800070000024  | 0.0641599969999973 | F | F | F |
| 0.0083123695863889 | -0.0024860740900098 | 0.1910608293472106 | T | T | T |
| 0.0034102700687042 | 0.7513726502776098  | 0.3319766725890791 | T | T | T |
| 0.7499999699999975 | 0.6249999790000018  | 0.0018099999999990 | F | F | F |
| 0.7499999699999975 | 0.3750000209999982  | 0.1301199910000008 | F | F | F |
| 0.7541001181083710 | 0.1360376951116171  | 0.2568183384982204 | T | T | T |
| 0.7499999699999975 | 0.8785200129999993  | 0.0036100000000019 | F | F | F |
| 0.7499999699999975 | 0.6285200129999993  | 0.1319299930000000 | F | F | F |
| 0.7560548132648947 | 0.3782535336150856  | 0.2573584338222087 | T | T | T |
| 0.5000000000000000 | 0.7535200339999975  | 0.0677699969999992 | F | F | F |
| 0.5071650620256674 | 0.5060914271718042  | 0.1950722223579677 | T | T | T |
| 0.5223283214878407 | 0.2580798634216546  | 0.3311404228774087 | T | T | T |
| 0.7499999699999975 | 0.3714799870000007  | 0.0000000000000000 | F | F | F |
| 0.7499999699999975 | 0.1214800070000024  | 0.1283199940000017 | F | F | F |
| 0.7528752636235788 | 0.8735137202189034  | 0.2565394202441560 | T | T | T |
| 0.5000000000000000 | 0.2464800070000024  | 0.0641599969999973 | F | F | F |
| 0.5086690393604519 | 0.9981379700505951  | 0.1906942818773698 | T | T | T |
| 0.3901676661285159 | 0.7532454554757505  | 0.3700643749483060 | T | T | T |
| 0.2500000000000000 | 0.1250000000000000  | 0.0018099999999990 | F | F | F |
| 0.2500000000000000 | 0.8750000209999982  | 0.1301199910000008 | F | F | F |
| 0.2546713403838990 | 0.6420649362862358  | 0.2627964100060539 | T | T | T |
| 0.7499999699999975 | 0.1250000000000000  | 0.0018099999999990 | F | F | F |
| 0.7499999699999975 | 0.8750000209999982  | 0.1301199910000008 | F | F | F |
| 0.7344245783184198 | 0.6480691142763353  | 0.2719449709501204 | T | T | T |
| 0.6732819753377847 | 0.8214273125526430  | 0.3824302899481626 | T | T | T |
| 0.5017504041389765 | 0.7883773402343762  | 0.3795843014869322 | T | T | T |

**Distal mechanism (state 4)**

|                    |                     |                    |
|--------------------|---------------------|--------------------|
| 1.0000000000000000 |                     |                    |
| 8.0600004195999997 | 0.0000000000000000  | 0.0000000000000000 |
| 0.0000000000000000 | 11.3985996245999992 | 0.0000000000000000 |

0.0000000000000000 0.0000000000000000 22.2077999115000004

Ba Ti O H N

8 12 30 8 2

Selective dynamics

Direct

|                    |                    |                    |   |   |   |
|--------------------|--------------------|--------------------|---|---|---|
| 0.0000000000000000 | 0.5000000000000000 | 0.0659599970000002 | F | F | F |
| 0.9956564025596943 | 0.2538886319319698 | 0.1919154484938272 | T | T | T |
| 0.0000000000000000 | 0.0000000000000000 | 0.0659599970000002 | F | F | F |
| 0.9989367765753385 | 0.7522884175476873 | 0.1863686389153629 | T | T | T |
| 0.5000000000000000 | 0.5000000000000000 | 0.0659599970000002 | F | F | F |
| 0.4962455137022144 | 0.2536466928728748 | 0.1914864220803664 | T | T | T |
| 0.5000000000000000 | 0.0000000000000000 | 0.0659599970000002 | F | F | F |
| 0.5010536315488539 | 0.7528936356890225 | 0.1886265814151865 | T | T | T |
| 0.2500000000000000 | 0.7461799980000023 | 0.0640000029999968 | F | F | F |
| 0.2388819009945382 | 0.4971779115005658 | 0.1874356553153756 | T | T | T |
| 0.2428211950839954 | 0.2599821435795580 | 0.3110132900577354 | T | T | T |
| 0.2500000000000000 | 0.2538200019999977 | 0.0679299979999968 | F | F | F |
| 0.2364793277425640 | 0.0156469557606202 | 0.1953053480800403 | T | T | T |
| 0.2299591942679949 | 0.7689767891492211 | 0.3135033416097205 | T | T | T |
| 0.7500000000000000 | 0.7461799980000023 | 0.0640000029999968 | F | F | F |
| 0.7388391133434634 | 0.4975012117529155 | 0.1874515386259807 | T | T | T |
| 0.7400149866932284 | 0.2602107697856323 | 0.3114768215866685 | T | T | T |
| 0.7500000000000000 | 0.2538200019999977 | 0.0679299979999968 | F | F | F |
| 0.7363541866842129 | 0.0151594251708145 | 0.1958287733725493 | T | T | T |
| 0.7830489043043155 | 0.7688851936144938 | 0.3161607607205242 | T | T | T |
| 0.2500000000000000 | 0.6250000000000000 | 0.0018099999999990 | F | F | F |
| 0.2500000000000000 | 0.3750000000000000 | 0.1301199939999975 | F | F | F |
| 0.2531655367913788 | 0.1358211730643759 | 0.2568690774859550 | T | T | T |
| 0.2500000000000000 | 0.8785200120000027 | 0.0036100000000019 | F | F | F |
| 0.2500000000000000 | 0.6285200120000027 | 0.1319299939999965 | F | F | F |
| 0.2553605223046905 | 0.3785359114901182 | 0.2572623473646458 | T | T | T |
| 0.0000000000000000 | 0.7535200120000027 | 0.0677699969999992 | F | F | F |
| 0.0070438422376411 | 0.5066135798326284 | 0.1951187847833636 | T | T | T |
| 0.0225210595889842 | 0.2584649984845870 | 0.3313528457341055 | T | T | T |
| 0.2500000000000000 | 0.3714799879999973 | 0.0000000000000000 | F | F | F |
| 0.2500000000000000 | 0.1214800030000021 | 0.1283199940000017 | F | F | F |
| 0.2581600711480270 | 0.8716646246644874 | 0.2539494555882424 | T | T | T |
| 0.0000000000000000 | 0.2464800030000021 | 0.0641599969999973 | F | F | F |
| 0.0078448109926639 | 0.9979774897295478 | 0.1913104808919855 | T | T | T |
| 0.0052140944359532 | 0.7526758373377441 | 0.3310939052421370 | T | T | T |
| 0.7500000000000000 | 0.6250000000000000 | 0.0018099999999990 | F | F | F |
| 0.7500000000000000 | 0.3750000000000000 | 0.1301199939999975 | F | F | F |
| 0.7530471164946667 | 0.1367325887469965 | 0.2572387101389457 | T | T | T |
| 0.7500000000000000 | 0.8785200120000027 | 0.0036100000000019 | F | F | F |
| 0.7500000000000000 | 0.6285200120000027 | 0.1319299939999965 | F | F | F |
| 0.7546188079643238 | 0.3789598409241425 | 0.2579231337104080 | T | T | T |
| 0.5000000000000000 | 0.7535200120000027 | 0.0677699969999992 | F | F | F |
| 0.5072346131951091 | 0.5064979831841310 | 0.1950890102383715 | T | T | T |
| 0.5185566816349954 | 0.2581590667795787 | 0.3308946655695322 | T | T | T |
| 0.7500000000000000 | 0.3714799879999973 | 0.0000000000000000 | F | F | F |
| 0.7500000000000000 | 0.1214800030000021 | 0.1283199940000017 | F | F | F |
| 0.7501890222909537 | 0.8715767278093745 | 0.2562143637798240 | T | T | T |
| 0.5000000000000000 | 0.2464800030000021 | 0.0641599969999973 | F | F | F |

|                    |                    |                    |   |   |   |
|--------------------|--------------------|--------------------|---|---|---|
| 0.5083252805532147 | 0.9989513483046770 | 0.1907292121698266 | T | T | T |
| 0.3913918227200266 | 0.7602368631418011 | 0.3706490688319470 | T | T | T |
| 0.2500000000000000 | 0.1250000000000000 | 0.0018099999999990 | F | F | F |
| 0.2500000000000000 | 0.8750000000000000 | 0.1301199939999975 | F | F | F |
| 0.2576605901890486 | 0.6438518365699705 | 0.2642243412425293 | T | T | T |
| 0.7500000000000000 | 0.1250000000000000 | 0.0018099999999990 | F | F | F |
| 0.7500000000000000 | 0.8750000000000000 | 0.1301199939999975 | F | F | F |
| 0.7459256521846256 | 0.6475609523505809 | 0.2623331533759021 | T | T | T |
| 0.6777394973023535 | 0.8268501315032223 | 0.3793915189603685 | T | T | T |
| 0.5029231439074270 | 0.7968998727241662 | 0.3783914265993816 | T | T | T |
| 0.7220175581971707 | 0.5989217163160201 | 0.3653616247560266 | T | T | T |
| 0.7068935568556375 | 0.5088743469314952 | 0.3847349736777772 | T | T | T |

**Distal mechanism (state 5)**

|                    |                     |                     |
|--------------------|---------------------|---------------------|
| 1.0000000000000000 |                     |                     |
| 8.0600004195999997 | 0.0000000000000000  | 0.0000000000000000  |
| 0.0000000000000000 | 11.3985996245999992 | 0.0000000000000000  |
| 0.0000000000000000 | 0.0000000000000000  | 22.2077999115000004 |

Ba Ti O H N  
8 12 30 8 2

Selective dynamics

Direct

|                    |                    |                    |   |   |   |
|--------------------|--------------------|--------------------|---|---|---|
| 0.0000000000000000 | 0.5000000000000000 | 0.0659599970000002 | F | F | F |
| 0.9914092060067535 | 0.2591043867332947 | 0.1927642932353746 | T | T | T |
| 0.0000000000000000 | 0.0000000000000000 | 0.0659599970000002 | F | F | F |
| 0.9961679458005189 | 0.7492017115764836 | 0.1891752014973579 | T | T | T |
| 0.5000000000000000 | 0.5000000000000000 | 0.0659599970000002 | F | F | F |
| 0.4997538670350167 | 0.2579503933754614 | 0.1920292021304329 | T | T | T |
| 0.5000000000000000 | 0.0000000000000000 | 0.0659599970000002 | F | F | F |
| 0.5037024726772804 | 0.7524932301358900 | 0.1937939418527441 | T | T | T |
| 0.2500000000000000 | 0.7461799980000023 | 0.0640000029999968 | F | F | F |
| 0.2442093878842378 | 0.4957266876223233 | 0.1870899103615848 | T | T | T |
| 0.2425598363583571 | 0.2584165214003812 | 0.3117528779110255 | T | T | T |
| 0.2500000000000000 | 0.2538200019999977 | 0.0679299979999968 | F | F | F |
| 0.2349863065644162 | 0.0169784660368768 | 0.1955674327012137 | T | T | T |
| 0.2281298660982816 | 0.8042879153508360 | 0.3231680845235381 | T | T | T |
| 0.7500000000000000 | 0.7461799980000023 | 0.0640000029999968 | F | F | F |
| 0.7372548962760734 | 0.5092294865403644 | 0.1947939010696388 | T | T | T |
| 0.7378953954699450 | 0.2551978466542523 | 0.3133486357648972 | T | T | T |
| 0.7500000000000000 | 0.2538200019999977 | 0.0679299979999968 | F | F | F |
| 0.7360944526736799 | 0.0161471083080890 | 0.1961302709908194 | T | T | T |
| 0.8183851960000869 | 0.8257806768290180 | 0.3298997487196403 | T | T | T |
| 0.2500000000000000 | 0.6250000000000000 | 0.0018099999999990 | F | F | F |
| 0.2500000000000000 | 0.3750000000000000 | 0.1301199939999975 | F | F | F |
| 0.2523774154191745 | 0.1356727009579781 | 0.2566778300481826 | T | T | T |
| 0.2500000000000000 | 0.8785200120000027 | 0.0036100000000019 | F | F | F |
| 0.2500000000000000 | 0.6285200120000027 | 0.1319299939999965 | F | F | F |
| 0.2544447160962334 | 0.3775124505832420 | 0.2587954000377213 | T | T | T |
| 0.0000000000000000 | 0.7535200120000027 | 0.0677699969999992 | F | F | F |
| 0.0120462627247546 | 0.5040822710066862 | 0.1947999948050333 | T | T | T |
| 0.0222461126515886 | 0.2561943702877272 | 0.3326722786411255 | T | T | T |
| 0.2500000000000000 | 0.3714799879999973 | 0.0000000000000000 | F | F | F |
| 0.2500000000000000 | 0.1214800030000021 | 0.1283199940000017 | F | F | F |

|                    |                     |                    |   |   |   |
|--------------------|---------------------|--------------------|---|---|---|
| 0.2618198669591718 | 0.8772862210694538  | 0.2529546205050231 | T | T | T |
| 0.0000000000000000 | 0.2464800030000021  | 0.0641599969999973 | F | F | F |
| 0.0085788140874115 | -0.0009369387181432 | 0.1902363738853020 | T | T | T |
| 0.0294461377383887 | 0.8514431459743442  | 0.3577063187706800 | T | T | T |
| 0.7500000000000000 | 0.6250000000000000  | 0.0018099999999990 | F | F | F |
| 0.7500000000000000 | 0.3750000000000000  | 0.1301199939999975 | F | F | F |
| 0.7531010542511936 | 0.1329755489579417  | 0.2580917881238414 | T | T | T |
| 0.7500000000000000 | 0.8785200120000027  | 0.0036100000000019 | F | F | F |
| 0.7500000000000000 | 0.6285200120000027  | 0.1319299939999965 | F | F | F |
| 0.7500448527571237 | 0.3711862591046885  | 0.2599264490538059 | T | T | T |
| 0.5000000000000000 | 0.7535200120000027  | 0.0677699969999992 | F | F | F |
| 0.4926824174379247 | 0.5055298286274664  | 0.1944322572840940 | T | T | T |
| 0.5155848470304892 | 0.2530776124320827  | 0.3325388782682144 | T | T | T |
| 0.7500000000000000 | 0.3714799879999973  | 0.0000000000000000 | F | F | F |
| 0.7500000000000000 | 0.1214800030000021  | 0.1283199940000017 | F | F | F |
| 0.7600278525118545 | 0.8813466571725279  | 0.2569604424129857 | T | T | T |
| 0.5000000000000000 | 0.2464800030000021  | 0.0641599969999973 | F | F | F |
| 0.5097663553119087 | 0.9991623098638542  | 0.1901885924581382 | T | T | T |
| 0.4048310937269986 | 0.7882154661444759  | 0.3716885724992076 | T | T | T |
| 0.2500000000000000 | 0.1250000000000000  | 0.0018099999999990 | F | F | F |
| 0.2500000000000000 | 0.8750000000000000  | 0.1301199939999975 | F | F | F |
| 0.2055616515327626 | 0.6653282101532448  | 0.2872789355670364 | T | T | T |
| 0.7500000000000000 | 0.1250000000000000  | 0.0018099999999990 | F | F | F |
| 0.7500000000000000 | 0.8750000000000000  | 0.1301199939999975 | F | F | F |
| 0.8815345949127317 | 0.5939196100612891  | 0.3338387126860453 | T | T | T |
| 0.6768619977594527 | 0.8575537508571941  | 0.3882294984051868 | T | T | T |
| 0.5221963447776257 | 0.8165857674874490  | 0.3798113261113316 | T | T | T |
| 0.7516612243352020 | 0.6167796140203951  | 0.2599543962537148 | T | T | T |
| 0.8137977635708091 | 0.6559779231630313  | 0.3100429218492198 | T | T | T |

**Distal mechanism (state 6)**

|                    |                     |                     |
|--------------------|---------------------|---------------------|
| 1.0000000000000000 |                     |                     |
| 8.0600004195999997 | 0.0000000000000000  | 0.0000000000000000  |
| 0.0000000000000000 | 11.3985996245999992 | 0.0000000000000000  |
| 0.0000000000000000 | 0.0000000000000000  | 22.2077999115000004 |

Ba Ti O H N  
8 12 30 8 2

Selective dynamics

Direct

|                     |                    |                    |   |   |   |
|---------------------|--------------------|--------------------|---|---|---|
| 0.0000000000000000  | 0.5000000000000000 | 0.0659599970000002 | F | F | F |
| 0.9916915209745275  | 0.2566575770781140 | 0.1918435362147041 | T | T | T |
| 0.0000000000000000  | 0.0000000000000000 | 0.0659599970000002 | F | F | F |
| -0.0044300997152217 | 0.7532669270613205 | 0.1878229181599331 | T | T | T |
| 0.5000000000000000  | 0.5000000000000000 | 0.0659599970000002 | F | F | F |
| 0.4985458210137197  | 0.2555409712314769 | 0.1918221028662580 | T | T | T |
| 0.5000000000000000  | 0.0000000000000000 | 0.0659599970000002 | F | F | F |
| 0.5029354614004183  | 0.7550016995860526 | 0.1950443157292765 | T | T | T |
| 0.2500000000000000  | 0.7461799980000023 | 0.0640000029999968 | F | F | F |
| 0.2389670950347794  | 0.5003041230249001 | 0.1884295062384055 | T | T | T |
| 0.2402167816796572  | 0.2605655352439925 | 0.3117033505598319 | T | T | T |
| 0.2500000000000000  | 0.2538200019999977 | 0.0679299979999968 | F | F | F |
| 0.2338923335911974  | 0.0142000006444311 | 0.1978697488867628 | T | T | T |
| 0.2324673231861284  | 0.7607359060771955 | 0.3081418701100825 | T | T | T |

|                    |                    |                    |   |   |   |
|--------------------|--------------------|--------------------|---|---|---|
| 0.7500000000000000 | 0.7461799980000023 | 0.0640000029999968 | F | F | F |
| 0.7343240950140799 | 0.5099459539818600 | 0.1940771535716010 | T | T | T |
| 0.7399207318420116 | 0.2577396056198190 | 0.3125060161975960 | T | T | T |
| 0.7500000000000000 | 0.2538200019999977 | 0.0679299979999968 | F | F | F |
| 0.7350629523259472 | 0.0105465226983930 | 0.2000607768814956 | T | T | T |
| 0.7969733070372191 | 0.7666857138801592 | 0.3168330233223891 | T | T | T |
| 0.2500000000000000 | 0.6250000000000000 | 0.0018099999999990 | F | F | F |
| 0.2500000000000000 | 0.3750000000000000 | 0.1301199939999975 | F | F | F |
| 0.2512755528473070 | 0.1364831898461543 | 0.2573458855017175 | T | T | T |
| 0.2500000000000000 | 0.8785200120000027 | 0.0036100000000019 | F | F | F |
| 0.2500000000000000 | 0.6285200120000027 | 0.1319299939999965 | F | F | F |
| 0.2539537113023692 | 0.3789296123078945 | 0.2586780937173968 | T | T | T |
| 0.0000000000000000 | 0.7535200120000027 | 0.0677699969999992 | F | F | F |
| 0.0101200461640286 | 0.5033674639218053 | 0.1925703907814079 | T | T | T |
| 0.0197545606560611 | 0.2587411330717161 | 0.3320428230273405 | T | T | T |
| 0.2500000000000000 | 0.3714799879999973 | 0.0000000000000000 | F | F | F |
| 0.2500000000000000 | 0.1214800030000021 | 0.1283199940000017 | F | F | F |
| 0.2518766082241689 | 0.8732459642481583 | 0.2488313214240456 | T | T | T |
| 0.0000000000000000 | 0.2464800030000021 | 0.0641599969999973 | F | F | F |
| 0.0075131234542319 | 0.0010964405911364 | 0.1898093190455570 | T | T | T |
| 0.0142855021259427 | 0.7537579762083203 | 0.3392449194457597 | T | T | T |
| 0.7500000000000000 | 0.6250000000000000 | 0.0018099999999990 | F | F | F |
| 0.7500000000000000 | 0.3750000000000000 | 0.1301199939999975 | F | F | F |
| 0.7518782415707053 | 0.1358806657545806 | 0.2578229949399252 | T | T | T |
| 0.7500000000000000 | 0.8785200120000027 | 0.0036100000000019 | F | F | F |
| 0.7500000000000000 | 0.6285200120000027 | 0.1319299939999965 | F | F | F |
| 0.7539687202057032 | 0.3760251841548930 | 0.2591605017503992 | T | T | T |
| 0.5000000000000000 | 0.7535200120000027 | 0.0677699969999992 | F | F | F |
| 0.4999635580068094 | 0.5036845877077566 | 0.1933218213837455 | T | T | T |
| 0.5192070021807046 | 0.2581979904593719 | 0.3320718807499028 | T | T | T |
| 0.7500000000000000 | 0.3714799879999973 | 0.0000000000000000 | F | F | F |
| 0.7500000000000000 | 0.1214800030000021 | 0.1283199940000017 | F | F | F |
| 0.7580555035440427 | 0.8785187019904543 | 0.2540107765504908 | T | T | T |
| 0.5000000000000000 | 0.2464800030000021 | 0.0641599969999973 | F | F | F |
| 0.5084093068996592 | 0.0001160025559493 | 0.1905758242035038 | T | T | T |
| 0.4244500787274861 | 0.7189575292532496 | 0.3346000311007657 | T | T | T |
| 0.2500000000000000 | 0.1250000000000000 | 0.0018099999999990 | F | F | F |
| 0.2500000000000000 | 0.8750000000000000 | 0.1301199939999975 | F | F | F |
| 0.2291090434613285 | 0.6405289307961901 | 0.2532296054407784 | T | T | T |
| 0.7500000000000000 | 0.1250000000000000 | 0.0018099999999990 | F | F | F |
| 0.7500000000000000 | 0.8750000000000000 | 0.1301199939999975 | F | F | F |
| 0.5828326391208275 | 0.5910767172957343 | 0.3330863532220429 | T | T | T |
| 0.7748277684952590 | 0.5237224387961215 | 0.3386915655447346 | T | T | T |
| 0.7020599906772420 | 0.7967406195637560 | 0.3841588200211725 | T | T | T |
| 0.7461090573054838 | 0.6268302071035606 | 0.2636946228708066 | T | T | T |
| 0.7082570153578734 | 0.5944487465191182 | 0.3237860003045845 | T | T | T |

**Distal mechanism (state 7)**

|                    |                     |                     |
|--------------------|---------------------|---------------------|
| 1.0000000000000000 |                     |                     |
| 8.0600004195999997 | 0.0000000000000000  | 0.0000000000000000  |
| 0.0000000000000000 | 11.3985996245999992 | 0.0000000000000000  |
| 0.0000000000000000 | 0.0000000000000000  | 22.2077999115000004 |
| Ba                 | Ti                  | O H N               |

8 12 30 8 2

Selective dynamics

Direct

|                     |                     |                    |   |   |   |
|---------------------|---------------------|--------------------|---|---|---|
| 0.0000000000000000  | 0.5000000000000000  | 0.0659599970000002 | F | F | F |
| 0.9956721357368579  | 0.2526301190212627  | 0.1901713949576700 | T | T | T |
| 0.0000000000000000  | 0.0000000000000000  | 0.0659599970000002 | F | F | F |
| 0.0009251475025687  | 0.7546477647631369  | 0.1873365943164498 | T | T | T |
| 0.5000000000000000  | 0.5000000000000000  | 0.0659599970000002 | F | F | F |
| 0.5009006301192177  | 0.2541583884993117  | 0.1914708596331952 | T | T | T |
| 0.5000000000000000  | 0.0000000000000000  | 0.0659599970000002 | F | F | F |
| 0.5014769109112585  | 0.7537793442107182  | 0.1899268409099955 | T | T | T |
| 0.2500000000000000  | 0.7461799980000023  | 0.0640000029999968 | F | F | F |
| 0.2535199472584395  | 0.4980361460796285  | 0.1864148856277047 | T | T | T |
| 0.2381753480243911  | 0.2576345238430582  | 0.3117195243573756 | T | T | T |
| 0.2500000000000000  | 0.2538200019999977  | 0.0679299979999968 | F | F | F |
| 0.2369045682451223  | 0.0147863772118232  | 0.1949619030607602 | T | T | T |
| 0.2372525969871949  | 0.7696874121849596  | 0.3126971067020682 | T | T | T |
| 0.7500000000000000  | 0.7461799980000023  | 0.0640000029999968 | F | F | F |
| 0.7648283729374801  | 0.5043154574762220  | 0.1903087895585313 | T | T | T |
| 0.7497454304056089  | 0.2520464411408295  | 0.3113503017551218 | T | T | T |
| 0.7500000000000000  | 0.2538200019999977  | 0.0679299979999968 | F | F | F |
| 0.7365315522637991  | 0.0114641255101798  | 0.1951964879535179 | T | T | T |
| 0.7737065581169035  | 0.7612546772816463  | 0.3128466574656008 | T | T | T |
| 0.2500000000000000  | 0.6250000000000000  | 0.0018099999999990 | F | F | F |
| 0.2500000000000000  | 0.3750000000000000  | 0.1301199939999975 | F | F | F |
| 0.25399699787778850 | 0.1356583957530674  | 0.2577097892289108 | T | T | T |
| 0.2500000000000000  | 0.8785200120000027  | 0.0036100000000019 | F | F | F |
| 0.2500000000000000  | 0.6285200120000027  | 0.1319299939999965 | F | F | F |
| 0.2493676938955809  | 0.3783576979985162  | 0.2601129260206381 | T | T | T |
| 0.0000000000000000  | 0.7535200120000027  | 0.0677699969999992 | F | F | F |
| -0.0014978931748815 | 0.5072532648173336  | 0.1946000407494972 | T | T | T |
| 0.0167150934030246  | 0.2536695462229972  | 0.3331531849652253 | T | T | T |
| 0.2500000000000000  | 0.3714799879999973  | 0.0000000000000000 | F | F | F |
| 0.2500000000000000  | 0.1214800030000021  | 0.1283199940000017 | F | F | F |
| 0.2515206149198945  | 0.8725722748219140  | 0.2520079848720004 | T | T | T |
| 0.0000000000000000  | 0.2464800030000021  | 0.0641599969999973 | F | F | F |
| 0.0085276571799590  | -0.0008272920060855 | 0.1902050780572519 | T | T | T |
| 0.0024182208066317  | 0.7542423271674157  | 0.3324361360656738 | T | T | T |
| 0.7500000000000000  | 0.6250000000000000  | 0.0018099999999990 | F | F | F |
| 0.7500000000000000  | 0.3750000000000000  | 0.1301199939999975 | F | F | F |
| 0.7548077387719350  | 0.1290526255956911  | 0.2576007224326037 | T | T | T |
| 0.7500000000000000  | 0.8785200120000027  | 0.0036100000000019 | F | F | F |
| 0.7500000000000000  | 0.6285200120000027  | 0.1319299939999965 | F | F | F |
| 0.7576805614444116  | 0.3696068327708737  | 0.2570616350549977 | T | T | T |
| 0.5000000000000000  | 0.7535200120000027  | 0.0677699969999992 | F | F | F |
| 0.4867098570291894  | 0.5016480975255327  | 0.1962802124202782 | T | T | T |
| 0.5299168234710322  | 0.2598249269069639  | 0.3341841808563026 | T | T | T |
| 0.7500000000000000  | 0.3714799879999973  | 0.0000000000000000 | F | F | F |
| 0.7500000000000000  | 0.1214800030000021  | 0.1283199940000017 | F | F | F |
| 0.7536570298903537  | 0.8685715179559417  | 0.2531718419294671 | T | T | T |
| 0.5000000000000000  | 0.2464800030000021  | 0.0641599969999973 | F | F | F |
| 0.5077660650647873  | -0.0018447361904081 | 0.1904870073387095 | T | T | T |
| 0.4454028081306065  | 0.7471867476500126  | 0.3409710053081767 | T | T | T |

|                    |                    |                    |   |   |   |
|--------------------|--------------------|--------------------|---|---|---|
| 0.2500000000000000 | 0.1250000000000000 | 0.0018099999999990 | F | F | F |
| 0.2500000000000000 | 0.8750000000000000 | 0.1301199939999975 | F | F | F |
| 0.2446667334668547 | 0.6462359022372621 | 0.2615614214338323 | T | T | T |
| 0.7500000000000000 | 0.1250000000000000 | 0.0018099999999990 | F | F | F |
| 0.7500000000000000 | 0.8750000000000000 | 0.1301199939999975 | F | F | F |
| 0.5173914327306094 | 0.6127123930940472 | 0.3311051305860228 | T | T | T |
| 0.5114368052827964 | 0.5127945921869976 | 0.2728905893372081 | T | T | T |
| 0.6389754835584880 | 0.4839814238867619 | 0.3303878334491094 | T | T | T |
| 0.7156299151780439 | 0.6149870521659935 | 0.2710592775996945 | T | T | T |
| 0.5892564097623195 | 0.5516974063513714 | 0.3057063346797801 | T | T | T |

**Distal mechanism (state 8)**

1.0000000000000000  
8.0600004195999997 0.0000000000000000 0.0000000000000000  
0.0000000000000000 11.3985996245999992 0.0000000000000000  
0.0000000000000000 0.0000000000000000 22.2077999115000004

Ba Ti O H N  
8 12 30 8 2

Selective dynamics

Direct

|                    |                    |                    |   |   |   |
|--------------------|--------------------|--------------------|---|---|---|
| 0.0000000000000000 | 0.5000000000000000 | 0.0659599970000002 | F | F | F |
| 0.9917721472796548 | 0.2572034095328815 | 0.1915124406374031 | T | T | T |
| 0.0000000000000000 | 0.0000000000000000 | 0.0659599970000002 | F | F | F |
| 0.0008644855407513 | 0.7549660395455438 | 0.1873509590486318 | T | T | T |
| 0.5000000000000000 | 0.5000000000000000 | 0.0659599970000002 | F | F | F |
| 0.5014095462732555 | 0.2577149964831367 | 0.1915515237513711 | T | T | T |
| 0.5000000000000000 | 0.0000000000000000 | 0.0659599970000002 | F | F | F |
| 0.5032765259784664 | 0.7525540827955689 | 0.1913538839135651 | T | T | T |
| 0.2500000000000000 | 0.7461799980000023 | 0.0640000029999968 | F | F | F |
| 0.2581628300935606 | 0.4994771143646828 | 0.1886478331314104 | T | T | T |
| 0.2390451198141354 | 0.2597711597085340 | 0.3118254988103816 | T | T | T |
| 0.2500000000000000 | 0.2538200019999977 | 0.0679299979999968 | F | F | F |
| 0.2346543160956639 | 0.0146231140794980 | 0.1980851863307878 | T | T | T |
| 0.2233362106629606 | 0.7684525688075301 | 0.3122237397899701 | T | T | T |
| 0.7500000000000000 | 0.7461799980000023 | 0.0640000029999968 | F | F | F |
| 0.7643566812387197 | 0.5150698379713499 | 0.1979951917749308 | T | T | T |
| 0.7389312466560521 | 0.2583538116992319 | 0.3126855283864873 | T | T | T |
| 0.7500000000000000 | 0.2538200019999977 | 0.0679299979999968 | F | F | F |
| 0.7336870159933053 | 0.0111452106178728 | 0.1999475666867314 | T | T | T |
| 0.7811280552374652 | 0.7540191873283953 | 0.3108126121400371 | T | T | T |
| 0.2500000000000000 | 0.6250000000000000 | 0.0018099999999990 | F | F | F |
| 0.2500000000000000 | 0.3750000000000000 | 0.1301199939999975 | F | F | F |
| 0.2513813851410967 | 0.1362797497913219 | 0.2574914430745994 | T | T | T |
| 0.2500000000000000 | 0.8785200120000027 | 0.0036100000000019 | F | F | F |
| 0.2500000000000000 | 0.6285200120000027 | 0.1319299939999965 | F | F | F |
| 0.2480504388433380 | 0.3777791841508725 | 0.2586495446127450 | T | T | T |
| 0.0000000000000000 | 0.7535200120000027 | 0.0677699969999992 | F | F | F |
| 0.0001935501906102 | 0.5066663490258200 | 0.1941532827780156 | T | T | T |
| 0.0189986989251573 | 0.2567256502697163 | 0.3333245111186662 | T | T | T |
| 0.2500000000000000 | 0.3714799879999973 | 0.0000000000000000 | F | F | F |
| 0.2500000000000000 | 0.1214800030000021 | 0.1283199940000017 | F | F | F |
| 0.2556724838416099 | 0.8744965888187498 | 0.2503584362163007 | T | T | T |
| 0.0000000000000000 | 0.2464800030000021 | 0.0641599969999973 | F | F | F |

|                    |                    |                    |   |   |   |
|--------------------|--------------------|--------------------|---|---|---|
| 0.0073812463307551 | 0.0000235228956036 | 0.1908059435505341 | T | T | T |
| 0.0013018807576218 | 0.7538481331381450 | 0.3331231197041530 | T | T | T |
| 0.7500000000000000 | 0.6250000000000000 | 0.0018099999999990 | F | F | F |
| 0.7500000000000000 | 0.3750000000000000 | 0.1301199939999975 | F | F | F |
| 0.7511095468395345 | 0.1354756158194670 | 0.2580796115722369 | T | T | T |
| 0.7500000000000000 | 0.8785200120000027 | 0.0036100000000019 | F | F | F |
| 0.7500000000000000 | 0.6285200120000027 | 0.1319299939999965 | F | F | F |
| 0.7505647793716150 | 0.3748957892052376 | 0.2592105504875049 | T | T | T |
| 0.5000000000000000 | 0.7535200120000027 | 0.0677699969999992 | F | F | F |
| 0.4872550162124385 | 0.5047699281202034 | 0.1941708019213999 | T | T | T |
| 0.5176695517673809 | 0.2576955950671810 | 0.3331394257154482 | T | T | T |
| 0.7500000000000000 | 0.3714799879999973 | 0.0000000000000000 | F | F | F |
| 0.7500000000000000 | 0.1214800030000021 | 0.1283199940000017 | F | F | F |
| 0.7466944714258018 | 0.8787566016855417 | 0.2564973212461127 | T | T | T |
| 0.5000000000000000 | 0.2464800030000021 | 0.0641599969999973 | F | F | F |
| 0.5078278122906718 | 0.0005465063457861 | 0.1902662460169866 | T | T | T |
| 0.3719049791528589 | 0.7699516711439196 | 0.3681797101925946 | T | T | T |
| 0.2500000000000000 | 0.1250000000000000 | 0.0018099999999990 | F | F | F |
| 0.2500000000000000 | 0.8750000000000000 | 0.1301199939999975 | F | F | F |
| 0.2564433281565446 | 0.6404452135897837 | 0.2616580077876484 | T | T | T |
| 0.7500000000000000 | 0.1250000000000000 | 0.0018099999999990 | F | F | F |
| 0.7500000000000000 | 0.8750000000000000 | 0.1301199939999975 | F | F | F |
| 0.5418970135005209 | 0.7269125079367814 | 0.3925531883688759 | T | T | T |
| 0.6726184255254668 | 0.6103717717991016 | 0.3962540435788556 | T | T | T |
| 0.7244832279988436 | 0.7311740369556088 | 0.4329009481591303 | T | T | T |
| 0.7485932457576389 | 0.6319411430938613 | 0.2607008790126685 | T | T | T |
| 0.6693089069474838 | 0.7000237678481664 | 0.3947151074493705 | T | T | T |

**Distal mechanism (state 9)**

1.0000000000000000  
8.0600004195999997 0.0000000000000000 0.0000000000000000  
0.0000000000000000 11.3985996245999992 0.0000000000000000  
0.0000000000000000 0.0000000000000000 22.2077999115000004

Ba Ti O H N  
8 12 30 5 1

Selective dynamics

Direct

|                    |                    |                    |   |   |   |
|--------------------|--------------------|--------------------|---|---|---|
| 0.0000000000000000 | 0.5000000000000000 | 0.0659599970000002 | F | F | F |
| 0.9914045419585995 | 0.2580417970050686 | 0.1919151092365551 | T | T | T |
| 0.0000000000000000 | 0.0000000000000000 | 0.0659599970000002 | F | F | F |
| 0.0003657533612681 | 0.7552364074407591 | 0.1894499171284663 | T | T | T |
| 0.5000000000000000 | 0.5000000000000000 | 0.0659599970000002 | F | F | F |
| 0.5017411601400646 | 0.2583187528313907 | 0.1917263938794826 | T | T | T |
| 0.5000000000000000 | 0.0000000000000000 | 0.0659599970000002 | F | F | F |
| 0.5027745446808889 | 0.7525888647278203 | 0.1932218220380712 | T | T | T |
| 0.2500000000000000 | 0.7461799980000023 | 0.0640000029999968 | F | F | F |
| 0.2577047675130326 | 0.4994205704009265 | 0.1881952858725250 | T | T | T |
| 0.2398973709924364 | 0.2594303359485214 | 0.3115763805064596 | T | T | T |
| 0.2500000000000000 | 0.2538200019999977 | 0.0679299979999968 | F | F | F |
| 0.2344049987820408 | 0.0160178402682352 | 0.1970519943082455 | T | T | T |
| 0.2444326110251333 | 0.7687450223235236 | 0.3119644867923566 | T | T | T |
| 0.7500000000000000 | 0.7461799980000023 | 0.0640000029999968 | F | F | F |
| 0.7643549200477927 | 0.5155830756401872 | 0.1977366785652977 | T | T | T |



|                    |                    |                    |   |   |   |
|--------------------|--------------------|--------------------|---|---|---|
| 0.7379516951622969 | 0.2581573111581486 | 0.3126581878419905 | T | T | T |
| 0.7500000000000000 | 0.2538200019999977 | 0.0679299979999968 | F | F | F |
| 0.7345451740773428 | 0.0115404618394519 | 0.1991430179419200 | T | T | T |
| 0.7689151829000472 | 0.7557819158503132 | 0.3108127013320630 | T | T | T |
| 0.2500000000000000 | 0.6250000000000000 | 0.0018099999999990 | F | F | F |
| 0.2500000000000000 | 0.3750000000000000 | 0.1301199939999975 | F | F | F |
| 0.2521684919130266 | 0.1354505838124224 | 0.2570827047647472 | T | T | T |
| 0.2500000000000000 | 0.8785200120000027 | 0.0036100000000019 | F | F | F |
| 0.2500000000000000 | 0.6285200120000027 | 0.1319299939999965 | F | F | F |
| 0.2479861670091175 | 0.3775147530953302 | 0.2583423021837115 | T | T | T |
| 0.0000000000000000 | 0.7535200120000027 | 0.0677699969999992 | F | F | F |
| 0.0001882941997314 | 0.5058249720060229 | 0.1938983723770407 | T | T | T |
| 0.0202388958020328 | 0.2555458085175359 | 0.3328624756920137 | T | T | T |
| 0.2500000000000000 | 0.3714799879999973 | 0.0000000000000000 | F | F | F |
| 0.2500000000000000 | 0.1214800030000021 | 0.1283199940000017 | F | F | F |
| 0.2490923584531560 | 0.8732440180071133 | 0.2508807248051273 | T | T | T |
| 0.0000000000000000 | 0.2464800030000021 | 0.0641599969999973 | F | F | F |
| 0.0076080612867391 | 0.0013275865892003 | 0.1901010669813493 | T | T | T |
| 0.0030601623042338 | 0.7567333892836151 | 0.3304927496719130 | T | T | T |
| 0.7500000000000000 | 0.6250000000000000 | 0.0018099999999990 | F | F | F |
| 0.7500000000000000 | 0.3750000000000000 | 0.1301199939999975 | F | F | F |
| 0.7514147702865592 | 0.1352100948301878 | 0.2579232366187776 | T | T | T |
| 0.7500000000000000 | 0.8785200120000027 | 0.0036100000000019 | F | F | F |
| 0.7500000000000000 | 0.6285200120000027 | 0.1319299939999965 | F | F | F |
| 0.7498530060388358 | 0.3747564064219029 | 0.2591873060297942 | T | T | T |
| 0.5000000000000000 | 0.7535200120000027 | 0.0677699969999992 | F | F | F |
| 0.4870231648680189 | 0.5051408144488639 | 0.1945285650661879 | T | T | T |
| 0.5162278662866199 | 0.2561198798451724 | 0.3323729684933564 | T | T | T |
| 0.7500000000000000 | 0.3714799879999973 | 0.0000000000000000 | F | F | F |
| 0.7500000000000000 | 0.1214800030000021 | 0.1283199940000017 | F | F | F |
| 0.7529878536421947 | 0.8769366810642414 | 0.2548870779411666 | T | T | T |
| 0.5000000000000000 | 0.2464800030000021 | 0.0641599969999973 | F | F | F |
| 0.5080400732540860 | 0.9997655987439765 | 0.1906022786481743 | T | T | T |
| 0.4608335133295727 | 0.7549251036548928 | 0.3321747297071720 | T | T | T |
| 0.2500000000000000 | 0.1250000000000000 | 0.0018099999999990 | F | F | F |
| 0.2500000000000000 | 0.8750000000000000 | 0.1301199939999975 | F | F | F |
| 0.2446397319306203 | 0.6466165926920235 | 0.2597382384788177 | T | T | T |
| 0.7500000000000000 | 0.1250000000000000 | 0.0018099999999990 | F | F | F |
| 0.7500000000000000 | 0.8750000000000000 | 0.1301199939999975 | F | F | F |
| 0.7530087296474398 | 0.6335755461290336 | 0.2604278220291049 | T | T | T |

**Distal mechanism (state 10)**

1.0000000000000000  
8.0600004195999997 0.0000000000000000 0.0000000000000000  
0.0000000000000000 11.3985996245999992 0.0000000000000000  
0.0000000000000000 0.0000000000000000 22.2077999115000004

Ba Ti O H N  
8 12 30 7 1

Selective dynamics

Direct

|                    |                    |                    |   |   |   |
|--------------------|--------------------|--------------------|---|---|---|
| 0.0000000000000000 | 0.5000000000000000 | 0.0659599970000002 | F | F | F |
| 0.9914251586324166 | 0.2580023856251144 | 0.1918909074332744 | T | T | T |
| 0.0000000000000000 | 0.0000000000000000 | 0.0659599970000002 | F | F | F |

|                    |                     |                    |   |   |   |
|--------------------|---------------------|--------------------|---|---|---|
| 0.0003412475624226 | 0.7554021240201461  | 0.1889278021231471 | T | T | T |
| 0.5000000000000000 | 0.5000000000000000  | 0.0659599970000002 | F | F | F |
| 0.5020067821126150 | 0.2583562995031283  | 0.1917096154064272 | T | T | T |
| 0.5000000000000000 | 0.0000000000000000  | 0.0659599970000002 | F | F | F |
| 0.5038292341343759 | 0.7525731144557402  | 0.1935081244722974 | T | T | T |
| 0.2500000000000000 | 0.7461799980000023  | 0.0640000029999968 | F | F | F |
| 0.2580970458792184 | 0.4994063816778547  | 0.1882416672906179 | T | T | T |
| 0.2399516980621361 | 0.2598831764929507  | 0.3115720201115003 | T | T | T |
| 0.2500000000000000 | 0.2538200019999977  | 0.0679299979999968 | F | F | F |
| 0.2344274119670042 | 0.0162175140770086  | 0.1970376569668217 | T | T | T |
| 0.2418059602844344 | 0.7683383830623205  | 0.3111288518084012 | T | T | T |
| 0.7500000000000000 | 0.7461799980000023  | 0.0640000029999968 | F | F | F |
| 0.7647417940801574 | 0.5151712840369483  | 0.1977128443894062 | T | T | T |
| 0.7379290371731477 | 0.2586224056733465  | 0.3127473601423407 | T | T | T |
| 0.7500000000000000 | 0.2538200019999977  | 0.0679299979999968 | F | F | F |
| 0.7345312222287343 | 0.0114731954218791  | 0.1995210894458016 | T | T | T |
| 0.7735167264905073 | 0.7551792741951825  | 0.3111458608347770 | T | T | T |
| 0.2500000000000000 | 0.6250000000000000  | 0.0018099999999990 | F | F | F |
| 0.2500000000000000 | 0.3750000000000000  | 0.1301199939999975 | F | F | F |
| 0.2520760702947228 | 0.1359342891153658  | 0.2571474863002177 | T | T | T |
| 0.2500000000000000 | 0.8785200120000027  | 0.0036100000000019 | F | F | F |
| 0.2500000000000000 | 0.6285200120000027  | 0.1319299939999965 | F | F | F |
| 0.2482683198036561 | 0.3780742496733203  | 0.2583747136119500 | T | T | T |
| 0.0000000000000000 | 0.7535200120000027  | 0.0677699969999992 | F | F | F |
| 0.0002120646152879 | 0.5059054493658173  | 0.1937871938415058 | T | T | T |
| 0.0202936706639079 | 0.2563979399478470  | 0.3330103668008061 | T | T | T |
| 0.2500000000000000 | 0.3714799879999973  | 0.0000000000000000 | F | F | F |
| 0.2500000000000000 | 0.1214800030000021  | 0.1283199940000017 | F | F | F |
| 0.2494667219067028 | 0.8733929328776379  | 0.2502028121563622 | T | T | T |
| 0.0000000000000000 | 0.2464800030000021  | 0.0641599969999973 | F | F | F |
| 0.0075892005252844 | 0.0014634989039455  | 0.1901109419220030 | T | T | T |
| 0.0045883751435012 | 0.7560729262255267  | 0.3311122565817419 | T | T | T |
| 0.7500000000000000 | 0.6250000000000000  | 0.0018099999999990 | F | F | F |
| 0.7500000000000000 | 0.3750000000000000  | 0.1301199939999975 | F | F | F |
| 0.7513194625578236 | 0.1356100959232949  | 0.2581465161984097 | T | T | T |
| 0.7500000000000000 | 0.8785200120000027  | 0.0036100000000019 | F | F | F |
| 0.7500000000000000 | 0.6285200120000027  | 0.1319299939999965 | F | F | F |
| 0.7499671419881089 | 0.3751833896953723  | 0.2592541855643243 | T | T | T |
| 0.5000000000000000 | 0.7535200120000027  | 0.0677699969999992 | F | F | F |
| 0.4873294403615728 | 0.5052361752968472  | 0.1944523520646330 | T | T | T |
| 0.5161527510562047 | 0.2567996897914442  | 0.3325065552072016 | T | T | T |
| 0.7500000000000000 | 0.3714799879999973  | 0.0000000000000000 | F | F | F |
| 0.7500000000000000 | 0.1214800030000021  | 0.1283199940000017 | F | F | F |
| 0.7530870331963343 | 0.8774637692932143  | 0.2552712349325605 | T | T | T |
| 0.5000000000000000 | 0.2464800030000021  | 0.0641599969999973 | F | F | F |
| 0.5081091002613439 | -0.0000745430040394 | 0.1906522824309147 | T | T | T |
| 0.4533766295956683 | 0.7540085571193790  | 0.3343802648012699 | T | T | T |
| 0.2500000000000000 | 0.1250000000000000  | 0.0018099999999990 | F | F | F |
| 0.2500000000000000 | 0.8750000000000000  | 0.1301199939999975 | F | F | F |
| 0.2450523597176720 | 0.6458620472136781  | 0.2587463650816693 | T | T | T |
| 0.7500000000000000 | 0.1250000000000000  | 0.0018099999999990 | F | F | F |
| 0.7500000000000000 | 0.8750000000000000  | 0.1301199939999975 | F | F | F |
| 0.7493818144217188 | 0.6921833683316627  | 0.4056497781463834 | T | T | T |

0.6574622435565937 0.6980306524146808 0.3965840181861793 T T T  
 0.7539115996157302 0.6330147968633842 0.2608697118666324 T T T

**Distal mechanism (state 11)**

1.0000000000000000  
 8.0600004195999997 0.0000000000000000 0.0000000000000000  
 0.0000000000000000 11.3985996245999992 0.0000000000000000  
 0.0000000000000000 0.0000000000000000 22.2077999115000004

Ba Ti O H N  
 8 12 30 7 1

Selective dynamics

Direct

0.0000000000000000 0.5000000000000000 0.0659599970000002 F F F  
 0.9910766337046737 0.2587698352254800 0.1920154196850982 T T T  
 0.0000000000000000 0.0000000000000000 0.0659599970000002 F F F  
 0.0010416770767852 0.7548181962691761 0.1869725001751134 T T T  
 0.5000000000000000 0.5000000000000000 0.0659599970000002 F F F  
 0.5019838410512351 0.2598040303732377 0.1917865799757824 T T T  
 0.5000000000000000 0.0000000000000000 0.0659599970000002 F F F  
 0.5039227001574357 0.7522055899357339 0.1911694418398431 T T T  
 0.2500000000000000 0.7461799980000023 0.0640000029999968 F F F  
 0.2565647533315685 0.4989665297250419 0.1884685956682645 T T T  
 0.2397069044747687 0.2602454738684086 0.3118079108894480 T T T  
 0.2500000000000000 0.2538200019999977 0.0679299979999968 F F F  
 0.2366400250921058 0.0165918851413389 0.1976585436121578 T T T  
 0.2246827950251830 0.7666837258111842 0.3134571349755941 T T T  
 0.7500000000000000 0.7461799980000023 0.0640000029999968 F F F  
 0.7629751427918335 0.5176033883706406 0.2000248943319370 T T T  
 0.7376007405447514 0.2590708123015412 0.3129541687320959 T T T  
 0.7500000000000000 0.2538200019999977 0.0679299979999968 F F F  
 0.7333418600089411 0.0131530600511333 0.1992787506819021 T T T  
 0.7847657204202905 0.7596234337037310 0.3100365979755464 T T T  
 0.2500000000000000 0.6250000000000000 0.0018099999999990 F F F  
 0.2500000000000000 0.3750000000000000 0.1301199939999975 F F F  
 0.2524836852466958 0.1362163317463980 0.2571235312838903 T T T  
 0.2500000000000000 0.8785200120000027 0.0036100000000019 F F F  
 0.2500000000000000 0.6285200120000027 0.1319299939999965 F F F  
 0.2481645689856581 0.3777853312345492 0.2581923673234970 T T T  
 0.0000000000000000 0.7535200120000027 0.0677699969999992 F F F  
 0.0009233022283532 0.5077403486547604 0.1947617988211840 T T T  
 0.0199562477567106 0.2563019202554515 0.3322260794063779 T T T  
 0.2500000000000000 0.3714799879999973 0.0000000000000000 F F F  
 0.2500000000000000 0.1214800030000021 0.1283199940000017 F F F  
 0.2604407745531758 0.8731944074017138 0.2542813947951854 T T T  
 0.0000000000000000 0.2464800030000021 0.0641599969999973 F F F  
 0.0102516144455002 -0.0007284130467772 0.1910164615452661 T T T  
 0.0071971900283201 0.7547460887334476 0.3331975971922241 T T T  
 0.7500000000000000 0.6250000000000000 0.0018099999999990 F F F  
 0.7500000000000000 0.3750000000000000 0.1301199939999975 F F F  
 0.7509232642071449 0.1362488250926341 0.2577386470647670 T T T  
 0.7500000000000000 0.8785200120000027 0.0036100000000019 F F F  
 0.7500000000000000 0.6285200120000027 0.1319299939999965 F F F  
 0.7502070935651535 0.3754220424620372 0.2593055967669075 T T T

|                    |                    |                    |   |   |   |
|--------------------|--------------------|--------------------|---|---|---|
| 0.5000000000000000 | 0.7535200120000027 | 0.0677699969999992 | F | F | F |
| 0.4862970348370836 | 0.5057674293508775 | 0.1945523105481909 | T | T | T |
| 0.5159481917992396 | 0.2569874732316053 | 0.3317698376137609 | T | T | T |
| 0.7500000000000000 | 0.3714799879999973 | 0.0000000000000000 | F | F | F |
| 0.7500000000000000 | 0.1214800030000021 | 0.1283199940000017 | F | F | F |
| 0.7495548209658484 | 0.8801919968337576 | 0.2551056555598341 | T | T | T |
| 0.5000000000000000 | 0.2464800030000021 | 0.0641599969999973 | F | F | F |
| 0.5070361476586196 | 0.0005702336977899 | 0.1902310559414992 | T | T | T |
| 0.3716946636792646 | 0.7421397521962533 | 0.3729412278845227 | T | T | T |
| 0.2500000000000000 | 0.1250000000000000 | 0.0018099999999990 | F | F | F |
| 0.2500000000000000 | 0.8750000000000000 | 0.1301199939999975 | F | F | F |
| 0.2487583356555969 | 0.6438191390493397 | 0.2617172398517745 | T | T | T |
| 0.7500000000000000 | 0.1250000000000000 | 0.0018099999999990 | F | F | F |
| 0.7500000000000000 | 0.8750000000000000 | 0.1301199939999975 | F | F | F |
| 0.6585392470531731 | 0.7639937950754050 | 0.3752123498052092 | T | T | T |
| 0.4971948287966760 | 0.7531218868898620 | 0.3759009310748355 | T | T | T |
| 0.745443325523263  | 0.6337317451679398 | 0.2612531759446902 | T | T | T |

**Distal mechanism (state 12)**

|                    |                     |                     |
|--------------------|---------------------|---------------------|
| 1.0000000000000000 |                     |                     |
| 8.0600004195999997 | 0.0000000000000000  | 0.0000000000000000  |
| 0.0000000000000000 | 11.3985996245999992 | 0.0000000000000000  |
| 0.0000000000000000 | 0.0000000000000000  | 22.2077999115000004 |

Ba Ti O H N  
8 12 30 7 1

Selective dynamics

Direct

|                    |                    |                    |   |   |   |
|--------------------|--------------------|--------------------|---|---|---|
| 0.0000000000000000 | 0.5000000000000000 | 0.0659599970000002 | F | F | F |
| 0.9942634256868984 | 0.2555610076590147 | 0.1917803933695101 | T | T | T |
| 0.0000000000000000 | 0.0000000000000000 | 0.0659599970000002 | F | F | F |
| 0.0026620420387317 | 0.7529746681400529 | 0.1859559323675608 | T | T | T |
| 0.5000000000000000 | 0.5000000000000000 | 0.0659599970000002 | F | F | F |
| 0.5000371598968313 | 0.2569809460639559 | 0.1918394293153695 | T | T | T |
| 0.5000000000000000 | 0.0000000000000000 | 0.0659599970000002 | F | F | F |
| 0.5017705403335760 | 0.7506325700110604 | 0.1916464037689999 | T | T | T |
| 0.2500000000000000 | 0.7461799980000023 | 0.0640000029999968 | F | F | F |
| 0.2584190041438650 | 0.4969773605354336 | 0.1873444132133694 | T | T | T |
| 0.2397379247958268 | 0.2587809226013592 | 0.3114703338075089 | T | T | T |
| 0.2500000000000000 | 0.2538200019999977 | 0.0679299979999968 | F | F | F |
| 0.2367833015230681 | 0.0159556774661631 | 0.1957477707305316 | T | T | T |
| 0.2236561381252173 | 0.7706791519978240 | 0.3168129575815723 | T | T | T |
| 0.7500000000000000 | 0.7461799980000023 | 0.0640000029999968 | F | F | F |
| 0.7632703011219677 | 0.5070766193553743 | 0.1907618514577081 | T | T | T |
| 0.7394426264211168 | 0.2565210789621436 | 0.3121216331403016 | T | T | T |
| 0.7500000000000000 | 0.2538200019999977 | 0.0679299979999968 | F | F | F |
| 0.7343979292288882 | 0.0140470427457184 | 0.1961925076053076 | T | T | T |
| 0.7961066503673959 | 0.7649106645867529 | 0.3096309817683312 | T | T | T |
| 0.2500000000000000 | 0.6250000000000000 | 0.0018099999999990 | F | F | F |
| 0.2500000000000000 | 0.3750000000000000 | 0.1301199939999975 | F | F | F |
| 0.2528050784489373 | 0.1353867573768036 | 0.2570795550338754 | T | T | T |
| 0.2500000000000000 | 0.8785200120000027 | 0.0036100000000019 | F | F | F |
| 0.2500000000000000 | 0.6285200120000027 | 0.1319299939999965 | F | F | F |
| 0.2475801183990482 | 0.3774989704255750 | 0.2581435748010245 | T | T | T |

|                     |                     |                    |   |   |   |
|---------------------|---------------------|--------------------|---|---|---|
| 0.0000000000000000  | 0.7535200120000027  | 0.0677699969999992 | F | F | F |
| -0.0027097896230743 | 0.5048818958723047  | 0.1930546406424297 | T | T | T |
| 0.0193358848107601  | 0.2552106085630509  | 0.3324637473412828 | T | T | T |
| 0.2500000000000000  | 0.3714799879999973  | 0.0000000000000000 | F | F | F |
| 0.2500000000000000  | 0.1214800030000021  | 0.1283199940000017 | F | F | F |
| 0.2543522096343619  | 0.8714761659196910  | 0.2560222509012929 | T | T | T |
| 0.0000000000000000  | 0.2464800030000021  | 0.0641599969999973 | F | F | F |
| 0.0096356168101978  | 0.9984908087328347  | 0.1906659398353641 | T | T | T |
| 0.0100895817690180  | 0.7654832895980616  | 0.3442638889722565 | T | T | T |
| 0.7500000000000000  | 0.6250000000000000  | 0.0018099999999990 | F | F | F |
| 0.7500000000000000  | 0.3750000000000000  | 0.1301199939999975 | F | F | F |
| 0.7522280181899094  | 0.1340195282561413  | 0.2572671761614398 | T | T | T |
| 0.7500000000000000  | 0.8785200120000027  | 0.0036100000000019 | F | F | F |
| 0.7500000000000000  | 0.6285200120000027  | 0.1319299939999965 | F | F | F |
| 0.7514787107532925  | 0.3746234887331415  | 0.2591108830413484 | T | T | T |
| 0.5000000000000000  | 0.7535200120000027  | 0.0677699969999992 | F | F | F |
| 0.4881725888723085  | 0.5036205168754411  | 0.1936430195409272 | T | T | T |
| 0.5177666591557453  | 0.2556151129576686  | 0.3319673472262285 | T | T | T |
| 0.7500000000000000  | 0.3714799879999973  | 0.0000000000000000 | F | F | F |
| 0.7500000000000000  | 0.1214800030000021  | 0.1283199940000017 | F | F | F |
| 0.7517267322341888  | 0.8754548701859751  | 0.2534713547047088 | T | T | T |
| 0.5000000000000000  | 0.2464800030000021  | 0.0641599969999973 | F | F | F |
| 0.5068200015971006  | -0.0015344371595757 | 0.1905387736935283 | T | T | T |
| 0.3907475361458015  | 0.7562537961784233  | 0.3724068053533430 | T | T | T |
| 0.2500000000000000  | 0.1250000000000000  | 0.0018099999999990 | F | F | F |
| 0.2500000000000000  | 0.8750000000000000  | 0.1301199939999975 | F | F | F |
| 0.2405440540268450  | 0.6448698947700361  | 0.2670023638640664 | T | T | T |
| 0.7500000000000000  | 0.1250000000000000  | 0.0018099999999990 | F | F | F |
| 0.7500000000000000  | 0.8750000000000000  | 0.1301199939999975 | F | F | F |
| 0.5088969661414892  | 0.7788684815075823  | 0.3715113426280880 | T | T | T |
| 0.7466925812470999  | 0.5600349857420814  | 0.2977347644310446 | T | T | T |
| 0.7441058542321415  | 0.6264061740885605  | 0.2658118053625348 | T | T | T |

**Distal mechanism (state 13)**

|                    |                     |                     |
|--------------------|---------------------|---------------------|
| 1.0000000000000000 |                     |                     |
| 8.0600004195999997 | 0.0000000000000000  | 0.0000000000000000  |
| 0.0000000000000000 | 11.3985996245999992 | 0.0000000000000000  |
| 0.0000000000000000 | 0.0000000000000000  | 22.2077999115000004 |

Ba Ti O H N  
8 12 30 7 1

Selective dynamics

Direct

|                    |                    |                    |   |   |   |
|--------------------|--------------------|--------------------|---|---|---|
| 0.0000000000000000 | 0.5000000000000000 | 0.0659599970000002 | F | F | F |
| 0.9962257059380963 | 0.2537350528528764 | 0.1916362705452676 | T | T | T |
| 0.0000000000000000 | 0.0000000000000000 | 0.0659599970000002 | F | F | F |
| 0.0005710077191676 | 0.7529131605197428 | 0.1887745886476059 | T | T | T |
| 0.5000000000000000 | 0.5000000000000000 | 0.0659599970000002 | F | F | F |
| 0.4988291014468281 | 0.2540660235353662 | 0.1916068504856151 | T | T | T |
| 0.5000000000000000 | 0.0000000000000000 | 0.0659599970000002 | F | F | F |
| 0.5026032508251527 | 0.7527429921995351 | 0.1909959289737908 | T | T | T |
| 0.2500000000000000 | 0.7461799980000023 | 0.0640000029999968 | F | F | F |
| 0.2596913132591312 | 0.4975839847330813 | 0.1870896726713035 | T | T | T |
| 0.2404269783045515 | 0.2584057653611534 | 0.3111441982199536 | T | T | T |

|                    |                     |                    |   |   |   |
|--------------------|---------------------|--------------------|---|---|---|
| 0.2500000000000000 | 0.2538200019999977  | 0.0679299979999968 | F | F | F |
| 0.2361186586961741 | 0.0149276422672019  | 0.1949099204318754 | T | T | T |
| 0.2523781673413134 | 0.7720416097978617  | 0.3136514983106591 | T | T | T |
| 0.7500000000000000 | 0.7461799980000023  | 0.0640000029999968 | F | F | F |
| 0.7614237493768797 | 0.5010324594853386  | 0.1877466598434689 | T | T | T |
| 0.7395501615147870 | 0.2542329507454409  | 0.3116286689028833 | T | T | T |
| 0.7500000000000000 | 0.2538200019999977  | 0.0679299979999968 | F | F | F |
| 0.7370579499436211 | 0.0135812504932788  | 0.1948934196177164 | T | T | T |
| 0.7738854714124660 | 0.7733212850650788  | 0.3171967832522567 | T | T | T |
| 0.2500000000000000 | 0.6250000000000000  | 0.0018099999999990 | F | F | F |
| 0.2500000000000000 | 0.3750000000000000  | 0.1301199939999975 | F | F | F |
| 0.2524572250685767 | 0.1349792887751965  | 0.2570215879875084 | T | T | T |
| 0.2500000000000000 | 0.8785200120000027  | 0.0036100000000019 | F | F | F |
| 0.2500000000000000 | 0.6285200120000027  | 0.1319299939999965 | F | F | F |
| 0.2488052005992674 | 0.3779372483630640  | 0.2581835887566357 | T | T | T |
| 0.0000000000000000 | 0.7535200120000027  | 0.0677699969999992 | F | F | F |
| 0.9948265234611163 | 0.5056205377987536  | 0.1947413980518428 | T | T | T |
| 0.0195300956408025 | 0.2559619445198006  | 0.3326828217100441 | T | T | T |
| 0.2500000000000000 | 0.3714799879999973  | 0.0000000000000000 | F | F | F |
| 0.2500000000000000 | 0.1214800030000021  | 0.1283199940000017 | F | F | F |
| 0.2511662809361409 | 0.8719053790594465  | 0.2518682860031797 | T | T | T |
| 0.0000000000000000 | 0.2464800030000021  | 0.0641599969999973 | F | F | F |
| 0.0075769257199538 | -0.0009696968201475 | 0.1901800234995636 | T | T | T |
| 0.0019284976024864 | 0.7623306268797772  | 0.3337457607539088 | T | T | T |
| 0.7500000000000000 | 0.6250000000000000  | 0.0018099999999990 | F | F | F |
| 0.7500000000000000 | 0.3750000000000000  | 0.1301199939999975 | F | F | F |
| 0.7534354334670732 | 0.1303244485603925  | 0.2582338739703726 | T | T | T |
| 0.7500000000000000 | 0.8785200120000027  | 0.0036100000000019 | F | F | F |
| 0.7500000000000000 | 0.6285200120000027  | 0.1319299939999965 | F | F | F |
| 0.7505800721262113 | 0.3702694866536799  | 0.2573272799111174 | T | T | T |
| 0.5000000000000000 | 0.7535200120000027  | 0.0677699969999992 | F | F | F |
| 0.4915118379913251 | 0.5052209147631305  | 0.1949797033771990 | T | T | T |
| 0.5172610079061114 | 0.2551121818285907  | 0.3321364775704017 | T | T | T |
| 0.7500000000000000 | 0.3714799879999973  | 0.0000000000000000 | F | F | F |
| 0.7500000000000000 | 0.1214800030000021  | 0.1283199940000017 | F | F | F |
| 0.7546850924957031 | 0.8696573735082801  | 0.2541763902721015 | T | T | T |
| 0.5000000000000000 | 0.2464800030000021  | 0.0641599969999973 | F | F | F |
| 0.5088089359811485 | -0.0020609500070033 | 0.1905751657461922 | T | T | T |
| 0.4707124981833110 | 0.7580338895949327  | 0.3323840203774845 | T | T | T |
| 0.2500000000000000 | 0.1250000000000000  | 0.0018099999999990 | F | F | F |
| 0.2500000000000000 | 0.8750000000000000  | 0.1301199939999975 | F | F | F |
| 0.2460915945078440 | 0.6472125989425895  | 0.2636637198082847 | T | T | T |
| 0.7500000000000000 | 0.1250000000000000  | 0.0018099999999990 | F | F | F |
| 0.7500000000000000 | 0.8750000000000000  | 0.1301199939999975 | F | F | F |
| 0.6403669945704212 | 0.5733354647680088  | 0.2933045970154787 | T | T | T |
| 0.8431218096596690 | 0.5611969772957047  | 0.2939464431534904 | T | T | T |
| 0.7474838149518699 | 0.6110798563597397  | 0.2770812830634338 | T | T | T |

**Distal mechanism (state 14)**

|                    |                     |                     |
|--------------------|---------------------|---------------------|
| 1.0000000000000000 |                     |                     |
| 8.0600004195999997 | 0.0000000000000000  | 0.0000000000000000  |
| 0.0000000000000000 | 11.3985996245999992 | 0.0000000000000000  |
| 0.0000000000000000 | 0.0000000000000000  | 22.2077999115000004 |

Ba Ti O H N  
8 12 30 9 1

Selective dynamics

Direct

|                     |                    |                    |   |   |   |
|---------------------|--------------------|--------------------|---|---|---|
| 0.0000000000000000  | 0.5000000000000000 | 0.0659599970000002 | F | F | F |
| 0.9966017571011958  | 0.2538569010245763 | 0.1914771652492634 | T | T | T |
| 0.0000000000000000  | 0.0000000000000000 | 0.0659599970000002 | F | F | F |
| 0.0006273479276758  | 0.7527169053289489 | 0.1891469622474685 | T | T | T |
| 0.5000000000000000  | 0.5000000000000000 | 0.0659599970000002 | F | F | F |
| 0.4983305875942241  | 0.2542208873635753 | 0.1916435607796371 | T | T | T |
| 0.5000000000000000  | 0.0000000000000000 | 0.0659599970000002 | F | F | F |
| 0.5017233953975123  | 0.7526863192213550 | 0.1905519457426001 | T | T | T |
| 0.2500000000000000  | 0.7461799980000023 | 0.0640000029999968 | F | F | F |
| 0.2595236091231522  | 0.4977784637140413 | 0.1871113482988237 | T | T | T |
| 0.2399286850566799  | 0.2578225263321330 | 0.3112700724326908 | T | T | T |
| 0.2500000000000000  | 0.2538200019999977 | 0.0679299979999968 | F | F | F |
| 0.2359100282385266  | 0.0147664648605619 | 0.1947869023977526 | T | T | T |
| 0.2522420280024485  | 0.7714448615854042 | 0.3133543786113254 | T | T | T |
| 0.7500000000000000  | 0.7461799980000023 | 0.0640000029999968 | F | F | F |
| 0.7614619384099475  | 0.5008653744088986 | 0.1875728305648686 | T | T | T |
| 0.7404005728455617  | 0.2538272245550895 | 0.3116343488175640 | T | T | T |
| 0.7500000000000000  | 0.2538200019999977 | 0.0679299979999968 | F | F | F |
| 0.7370780261330572  | 0.0142785402732068 | 0.1943708281392927 | T | T | T |
| 0.7662508873566114  | 0.7729896745951838 | 0.3172525404976974 | T | T | T |
| 0.2500000000000000  | 0.6250000000000000 | 0.0018099999999990 | F | F | F |
| 0.2500000000000000  | 0.3750000000000000 | 0.1301199939999975 | F | F | F |
| 0.2523097233382883  | 0.1347800952917444 | 0.2571338741550293 | T | T | T |
| 0.2500000000000000  | 0.8785200120000027 | 0.0036100000000019 | F | F | F |
| 0.2500000000000000  | 0.6285200120000027 | 0.1319299939999965 | F | F | F |
| 0.2485208056394141  | 0.3774682758567167 | 0.2584547329161019 | T | T | T |
| 0.0000000000000000  | 0.7535200120000027 | 0.0677699969999992 | F | F | F |
| 0.9947935180369490  | 0.5054176135592044 | 0.1947230429652721 | T | T | T |
| 0.0187062651128737  | 0.2548897866489702 | 0.3330354257015259 | T | T | T |
| 0.2500000000000000  | 0.3714799879999973 | 0.0000000000000000 | F | F | F |
| 0.2500000000000000  | 0.1214800030000021 | 0.1283199940000017 | F | F | F |
| 0.2513583491620049  | 0.8722001376739400 | 0.2520168155005946 | T | T | T |
| 0.0000000000000000  | 0.2464800030000021 | 0.0641599969999973 | F | F | F |
| 0.0071108719785301  | 0.9988131624934787 | 0.1902494020434471 | T | T | T |
| -0.0007378401362209 | 0.7605581806327250 | 0.3310647307431570 | T | T | T |
| 0.7500000000000000  | 0.6250000000000000 | 0.0018099999999990 | F | F | F |
| 0.7500000000000000  | 0.3750000000000000 | 0.1301199939999975 | F | F | F |
| 0.7536941151157684  | 0.1298879812734005 | 0.2581136957254683 | T | T | T |
| 0.7500000000000000  | 0.8785200120000027 | 0.0036100000000019 | F | F | F |
| 0.7500000000000000  | 0.6285200120000027 | 0.1319299939999965 | F | F | F |
| 0.7505723024746096  | 0.3701240808754506 | 0.2574755638370544 | T | T | T |
| 0.5000000000000000  | 0.7535200120000027 | 0.0677699969999992 | F | F | F |
| 0.4915516130460088  | 0.5050808713517011 | 0.1951357363205032 | T | T | T |
| 0.5183342813600263  | 0.2540277576552072 | 0.3327036423523441 | T | T | T |
| 0.7500000000000000  | 0.3714799879999973 | 0.0000000000000000 | F | F | F |
| 0.7500000000000000  | 0.1214800030000021 | 0.1283199940000017 | F | F | F |
| 0.7534011845801406  | 0.8683713645832959 | 0.2543579164135040 | T | T | T |
| 0.5000000000000000  | 0.2464800030000021 | 0.0641599969999973 | F | F | F |
| 0.5087866578437049  | 0.9981534154973410 | 0.1904736637955840 | T | T | T |

|                    |                    |                    |   |   |   |
|--------------------|--------------------|--------------------|---|---|---|
| 0.4746736118728503 | 0.7576557095862670 | 0.3320143089397525 | T | T | T |
| 0.2500000000000000 | 0.1250000000000000 | 0.0018099999999990 | F | F | F |
| 0.2500000000000000 | 0.8750000000000000 | 0.1301199939999975 | F | F | F |
| 0.2471206402435338 | 0.6468262723886039 | 0.2631247373495793 | T | T | T |
| 0.7500000000000000 | 0.1250000000000000 | 0.0018099999999990 | F | F | F |
| 0.7500000000000000 | 0.8750000000000000 | 0.1301199939999975 | F | F | F |
| 0.6380157307184243 | 0.5737150571108639 | 0.2916557995479269 | T | T | T |
| 0.8411493769851720 | 0.5608161808899604 | 0.2945331199674461 | T | T | T |
| 0.7792158230273630 | 0.8602346345002267 | 0.4049140663336433 | T | T | T |
| 0.6847064268320672 | 0.8566793931187811 | 0.3997655947037689 | T | T | T |
| 0.7469695852230210 | 0.6111031626231039 | 0.2769870568732389 | T | T | T |

**Distal mechanism (state 15)**

|                    |                     |                     |
|--------------------|---------------------|---------------------|
| 1.0000000000000000 |                     |                     |
| 8.0600004195999997 | 0.0000000000000000  | 0.0000000000000000  |
| 0.0000000000000000 | 11.3985996245999992 | 0.0000000000000000  |
| 0.0000000000000000 | 0.0000000000000000  | 22.2077999115000004 |

Ba Ti O H N  
8 12 30 9 1

Selective dynamics

Direct

|                    |                    |                    |   |   |   |
|--------------------|--------------------|--------------------|---|---|---|
| 0.0000000000000000 | 0.5000000000000000 | 0.0659599970000002 | F | F | F |
| 0.9968587905471548 | 0.2534942248837998 | 0.1913973653456661 | T | T | T |
| 0.0000000000000000 | 0.0000000000000000 | 0.0659599970000002 | F | F | F |
| 0.0001209469180085 | 0.7521530401439590 | 0.1861628383403312 | T | T | T |
| 0.5000000000000000 | 0.5000000000000000 | 0.0659599970000002 | F | F | F |
| 0.4982135324672468 | 0.2538445956872947 | 0.1914893852432700 | T | T | T |
| 0.5000000000000000 | 0.0000000000000000 | 0.0659599970000002 | F | F | F |
| 0.5020991097727916 | 0.7524013657429576 | 0.1881944289315822 | T | T | T |
| 0.2500000000000000 | 0.7461799980000023 | 0.0640000029999968 | F | F | F |
| 0.2593107947585845 | 0.4968040478678525 | 0.1873288819874896 | T | T | T |
| 0.2397165062622710 | 0.2583075722775912 | 0.3111822837326426 | T | T | T |
| 0.2500000000000000 | 0.2538200019999977 | 0.0679299979999968 | F | F | F |
| 0.2373653594337274 | 0.0152498447743858 | 0.1948682611796072 | T | T | T |
| 0.2313596636591491 | 0.7682890018510181 | 0.3136344156875768 | T | T | T |
| 0.7500000000000000 | 0.7461799980000023 | 0.0640000029999968 | F | F | F |
| 0.7603473093593002 | 0.4991295163442809 | 0.1878164488393946 | T | T | T |
| 0.7399589659324296 | 0.2549551626425123 | 0.3115045472480133 | T | T | T |
| 0.7500000000000000 | 0.2538200019999977 | 0.0679299979999968 | F | F | F |
| 0.7369991727160360 | 0.0147041866798194 | 0.1946861538060116 | T | T | T |
| 0.7856746717158638 | 0.7752961363421397 | 0.3181455172554486 | T | T | T |
| 0.2500000000000000 | 0.6250000000000000 | 0.0018099999999990 | F | F | F |
| 0.2500000000000000 | 0.3750000000000000 | 0.1301199939999975 | F | F | F |
| 0.2523758176049924 | 0.1349320594899472 | 0.2569984680097315 | T | T | T |
| 0.2500000000000000 | 0.8785200120000027 | 0.0036100000000019 | F | F | F |
| 0.2500000000000000 | 0.6285200120000027 | 0.1319299939999965 | F | F | F |
| 0.2486305926778630 | 0.3775626337710857 | 0.2578429159194173 | T | T | T |
| 0.0000000000000000 | 0.7535200120000027 | 0.0677699969999992 | F | F | F |
| 0.9933472723365004 | 0.5068858928181155 | 0.1955522428616754 | T | T | T |
| 0.0185551905232700 | 0.2559913871758048 | 0.3319053616439893 | T | T | T |
| 0.2500000000000000 | 0.3714799879999973 | 0.0000000000000000 | F | F | F |
| 0.2500000000000000 | 0.1214800030000021 | 0.1283199940000017 | F | F | F |
| 0.2594766355688287 | 0.8713791079422761 | 0.2544581777663073 | T | T | T |



|                    |                    |                    |   |   |   |
|--------------------|--------------------|--------------------|---|---|---|
| 0.0000000000000000 | 0.2464800030000021 | 0.0641599969999973 | F | F | F |
| 0.0083527460237644 | 0.9965620470985537 | 0.1909876217537369 | T | T | T |
| 0.0061314237735854 | 0.7583213922352742 | 0.3338845247450902 | T | T | T |
| 0.7500000000000000 | 0.6250000000000000 | 0.0018099999999990 | F | F | F |
| 0.7500000000000000 | 0.3750000000000000 | 0.1301199939999975 | F | F | F |
| 0.7532739699148021 | 0.1319574269868064 | 0.2573339415152401 | T | T | T |
| 0.7500000000000000 | 0.8785200120000027 | 0.0036100000000019 | F | F | F |
| 0.7500000000000000 | 0.6285200120000027 | 0.1319299939999965 | F | F | F |
| 0.7509620485736545 | 0.3725012108851946 | 0.2575415208853577 | T | T | T |
| 0.5000000000000000 | 0.7535200120000027 | 0.0677699969999992 | F | F | F |
| 0.4916259761917093 | 0.5055817036903121 | 0.1952553692297081 | T | T | T |
| 0.5182133588336066 | 0.2555679982727888 | 0.3315294192853377 | T | T | T |
| 0.7500000000000000 | 0.3714799879999973 | 0.0000000000000000 | F | F | F |
| 0.7500000000000000 | 0.1214800030000021 | 0.1283199940000017 | F | F | F |
| 0.7501217811748975 | 0.8702432833916511 | 0.2559092269710255 | T | T | T |
| 0.5000000000000000 | 0.2464800030000021 | 0.0641599969999973 | F | F | F |
| 0.5083934703060413 | 0.9975579366964297 | 0.1903304516478341 | T | T | T |
| 0.3981089559358762 | 0.7511181509801346 | 0.3683607461659957 | T | T | T |
| 0.2500000000000000 | 0.1250000000000000 | 0.0018099999999990 | F | F | F |
| 0.2500000000000000 | 0.8750000000000000 | 0.1301199939999975 | F | F | F |
| 0.2508362442982093 | 0.6434447846179365 | 0.2639685410428841 | T | T | T |
| 0.7500000000000000 | 0.1250000000000000 | 0.0018099999999990 | F | F | F |
| 0.7500000000000000 | 0.8750000000000000 | 0.1301199939999975 | F | F | F |
| 0.6160757085668254 | 0.5827952238875104 | 0.2913173307450369 | T | T | T |
| 0.8131257254170715 | 0.5564394429178148 | 0.3000646697726489 | T | T | T |
| 0.6791559478587840 | 0.8254302052600921 | 0.3828019812904187 | T | T | T |
| 0.5070830164647842 | 0.7884593322985500 | 0.3790409582006137 | T | T | T |
| 0.7319240038037201 | 0.6158086781706715 | 0.2813985754100769 | T | T | T |

**Distal mechanism (state 16)**

|                    |                     |                     |
|--------------------|---------------------|---------------------|
| 1.0000000000000000 |                     |                     |
| 8.0600004195999997 | 0.0000000000000000  | 0.0000000000000000  |
| 0.0000000000000000 | 11.3985996245999992 | 0.0000000000000000  |
| 0.0000000000000000 | 0.0000000000000000  | 22.2077999115000004 |

Ba Ti O H N  
8 12 30 9 1

Selective dynamics

Direct

|                     |                    |                    |   |   |   |
|---------------------|--------------------|--------------------|---|---|---|
| 0.0000000000000000  | 0.5000000000000000 | 0.0659599970000002 | F | F | F |
| -0.0008208390514189 | 0.2543296917136372 | 0.1913223897808286 | T | T | T |
| 0.0000000000000000  | 0.0000000000000000 | 0.0659599970000002 | F | F | F |
| 0.0000694863446853  | 0.7535260340298583 | 0.1872643947405380 | T | T | T |
| 0.5000000000000000  | 0.5000000000000000 | 0.0659599970000002 | F | F | F |
| 0.4957924698961260  | 0.2525579079567579 | 0.1916917957061865 | T | T | T |
| 0.5000000000000000  | 0.0000000000000000 | 0.0659599970000002 | F | F | F |
| 0.4998001089055330  | 0.7557229464159663 | 0.1899069217723192 | T | T | T |
| 0.2500000000000000  | 0.7461799980000023 | 0.0640000029999968 | F | F | F |
| 0.2598647097834536  | 0.4981919105044839 | 0.1873379525331826 | T | T | T |
| 0.2378935110651399  | 0.2602539716667427 | 0.3113708426826133 | T | T | T |
| 0.2500000000000000  | 0.2538200019999977 | 0.0679299979999968 | F | F | F |
| 0.2354248619920499  | 0.0152626881848843 | 0.1953436016977913 | T | T | T |
| 0.2381657948156705  | 0.7741784940584588 | 0.3131214410893198 | T | T | T |
| 0.7500000000000000  | 0.7461799980000023 | 0.0640000029999968 | F | F | F |

|                    |                     |                    |   |   |   |
|--------------------|---------------------|--------------------|---|---|---|
| 0.7579294924896234 | 0.4947412743686400  | 0.1852319832944948 | T | T | T |
| 0.7404180011201936 | 0.2606011257046191  | 0.3111295321090047 | T | T | T |
| 0.7500000000000000 | 0.2538200019999977  | 0.0679299979999968 | F | F | F |
| 0.7397880480386017 | 0.0164806626115486  | 0.1942931608868435 | T | T | T |
| 0.7863906722613943 | 0.8004095946470143  | 0.3307922328322950 | T | T | T |
| 0.2500000000000000 | 0.6250000000000000  | 0.0018099999999990 | F | F | F |
| 0.2500000000000000 | 0.3750000000000000  | 0.1301199939999975 | F | F | F |
| 0.2508441233755495 | 0.1366261110406949  | 0.2573472002475421 | T | T | T |
| 0.2500000000000000 | 0.8785200120000027  | 0.0036100000000019 | F | F | F |
| 0.2500000000000000 | 0.6285200120000027  | 0.1319299939999965 | F | F | F |
| 0.2495320054681731 | 0.3787978990516411  | 0.2577013620511662 | T | T | T |
| 0.0000000000000000 | 0.7535200120000027  | 0.0677699969999992 | F | F | F |
| 0.9907811257005897 | 0.5087367142829013  | 0.1963603484367563 | T | T | T |
| 0.0160856584777100 | 0.2597121182564093  | 0.3317386391388518 | T | T | T |
| 0.2500000000000000 | 0.3714799879999973  | 0.0000000000000000 | F | F | F |
| 0.2500000000000000 | 0.1214800030000021  | 0.1283199940000017 | F | F | F |
| 0.2517930659298283 | 0.8736522897720738  | 0.2505757741330767 | T | T | T |
| 0.0000000000000000 | 0.2464800030000021  | 0.0641599969999973 | F | F | F |
| 0.0041887227341483 | -0.0000688009359547 | 0.1912479270352571 | T | T | T |
| 0.0065755851436064 | 0.7738836775807656  | 0.3412057349569438 | T | T | T |
| 0.7500000000000000 | 0.6250000000000000  | 0.0018099999999990 | F | F | F |
| 0.7500000000000000 | 0.3750000000000000  | 0.1301199939999975 | F | F | F |
| 0.7529748571348678 | 0.1398114231952496  | 0.2560154752617508 | T | T | T |
| 0.7500000000000000 | 0.8785200120000027  | 0.0036100000000019 | F | F | F |
| 0.7500000000000000 | 0.6285200120000027  | 0.1319299939999965 | F | F | F |
| 0.7489710676706618 | 0.3863866901125796  | 0.2602145571615658 | T | T | T |
| 0.5000000000000000 | 0.7535200120000027  | 0.0677699969999992 | F | F | F |
| 0.4958335377671523 | 0.5094328300220226  | 0.1967975404219882 | T | T | T |
| 0.5201272176171343 | 0.2596116450626316  | 0.3321152274486496 | T | T | T |
| 0.7500000000000000 | 0.3714799879999973  | 0.0000000000000000 | F | F | F |
| 0.7500000000000000 | 0.1214800030000021  | 0.1283199940000017 | F | F | F |
| 0.7550055412321230 | 0.8569830830072840  | 0.2569980110400795 | T | T | T |
| 0.5000000000000000 | 0.2464800030000021  | 0.0641599969999973 | F | F | F |
| 0.5106807219952106 | 0.9991093720474931  | 0.1915350677854486 | T | T | T |
| 0.4372625503097252 | 0.7585799624004456  | 0.3442372620896545 | T | T | T |
| 0.2500000000000000 | 0.1250000000000000  | 0.0018099999999990 | F | F | F |
| 0.2500000000000000 | 0.8750000000000000  | 0.1301199939999975 | F | F | F |
| 0.2397966598324725 | 0.6466424306676629  | 0.2637207686392009 | T | T | T |
| 0.7500000000000000 | 0.1250000000000000  | 0.0018099999999990 | F | F | F |
| 0.7500000000000000 | 0.8750000000000000  | 0.1301199939999975 | F | F | F |
| 0.7220351486581786 | 0.5505785652348302  | 0.3136674276204488 | T | T | T |
| 0.7471973641319414 | 0.5899398309202276  | 0.3840381934937568 | T | T | T |
| 0.7472175740046334 | 0.9115734189256527  | 0.3809067741505086 | T | T | T |
| 0.5755345556344382 | 0.6349653072052081  | 0.3475334021835804 | T | T | T |
| 0.7027027932472242 | 0.6187650614223406  | 0.3434443942573702 | T | T | T |

**Distal mechanism (state 17)**

|                    |                     |                     |
|--------------------|---------------------|---------------------|
| 1.0000000000000000 |                     |                     |
| 8.0600004195999997 | 0.0000000000000000  | 0.0000000000000000  |
| 0.0000000000000000 | 11.3985996245999992 | 0.0000000000000000  |
| 0.0000000000000000 | 0.0000000000000000  | 22.2077999115000004 |

Ba Ti O H  
8 12 30 6

Selective dynamics

Direct

|                     |                     |                    |   |   |   |
|---------------------|---------------------|--------------------|---|---|---|
| 0.0000000000000000  | 0.5000000000000000  | 0.0659599970000002 | F | F | F |
| 0.9972122515950627  | 0.2522501151560921  | 0.1918228737828581 | T | T | T |
| 0.0000000000000000  | 0.0000000000000000  | 0.0659599970000002 | F | F | F |
| -0.0013264612505202 | 0.7552652634136335  | 0.1932125741867328 | T | T | T |
| 0.5000000000000000  | 0.5000000000000000  | 0.0659599970000002 | F | F | F |
| 0.4949518679454508  | 0.2535317772279849  | 0.1919801545316297 | T | T | T |
| 0.5000000000000000  | 0.0000000000000000  | 0.0659599970000002 | F | F | F |
| 0.4996803341083398  | 0.7538476245585937  | 0.1886950556940540 | T | T | T |
| 0.2500000000000000  | 0.7461799980000023  | 0.0640000029999968 | F | F | F |
| 0.2381912982234594  | 0.4985281518074331  | 0.1874521306845020 | T | T | T |
| 0.2414499723895579  | 0.2604974346908355  | 0.3111178873635414 | T | T | T |
| 0.2500000000000000  | 0.2538200019999977  | 0.0679299979999968 | F | F | F |
| 0.2371768955645909  | 0.0150529097253987  | 0.1956504597356959 | T | T | T |
| 0.2791498463804999  | 0.7667642629132692  | 0.3138334440126374 | T | T | T |
| 0.7500000000000000  | 0.7461799980000023  | 0.0640000029999968 | F | F | F |
| 0.7406421073576087  | 0.4942389450043808  | 0.1859591581305536 | T | T | T |
| 0.7428052133534961  | 0.2600264361761322  | 0.3109539901335662 | T | T | T |
| 0.7500000000000000  | 0.2538200019999977  | 0.0679299979999968 | F | F | F |
| 0.7343195767627827  | 0.0149068553628805  | 0.1953846329366541 | T | T | T |
| 0.7506103479095456  | 0.8108772184334451  | 0.3242087265291334 | T | T | T |
| 0.2500000000000000  | 0.6250000000000000  | 0.0018099999999990 | F | F | F |
| 0.2500000000000000  | 0.3750000000000000  | 0.1301199939999975 | F | F | F |
| 0.2535429965586422  | 0.1367077480122611  | 0.2572299449770356 | T | T | T |
| 0.2500000000000000  | 0.8785200120000027  | 0.0036100000000019 | F | F | F |
| 0.2500000000000000  | 0.6285200120000027  | 0.1319299939999965 | F | F | F |
| 0.2548042419921744  | 0.3789498125215251  | 0.2574149090768319 | T | T | T |
| 0.0000000000000000  | 0.7535200120000027  | 0.0677699969999992 | F | F | F |
| 0.0052871185498546  | 0.5077430733187223  | 0.1955525912648606 | T | T | T |
| 0.0207535110593530  | 0.2589119603744047  | 0.3311006238054578 | T | T | T |
| 0.2500000000000000  | 0.3714799879999973  | 0.0000000000000000 | F | F | F |
| 0.2500000000000000  | 0.1214800030000021  | 0.1283199940000017 | F | F | F |
| 0.2543859456197501  | 0.8729993905514003  | 0.2555006962400381 | T | T | T |
| 0.0000000000000000  | 0.2464800030000021  | 0.0641599969999973 | F | F | F |
| 0.0090567681527090  | -0.0006642010309872 | 0.1909741111739266 | T | T | T |
| -0.0439749380500576 | 0.7501036583466515  | 0.3269118900014841 | T | T | T |
| 0.7500000000000000  | 0.6250000000000000  | 0.0018099999999990 | F | F | F |
| 0.7500000000000000  | 0.3750000000000000  | 0.1301199939999975 | F | F | F |
| 0.7524829598315134  | 0.1375642349647612  | 0.2562353284768160 | T | T | T |
| 0.7500000000000000  | 0.8785200120000027  | 0.0036100000000019 | F | F | F |
| 0.7500000000000000  | 0.6285200120000027  | 0.1319299939999965 | F | F | F |
| 0.7569643603273718  | 0.3801479715727989  | 0.2577016057458746 | T | T | T |
| 0.5000000000000000  | 0.7535200120000027  | 0.0677699969999992 | F | F | F |
| 0.5099799503977239  | 0.5076202439532872  | 0.1958862738520979 | T | T | T |
| 0.5224585192098093  | 0.2593241601402684  | 0.3310892752403606 | T | T | T |
| 0.7500000000000000  | 0.3714799879999973  | 0.0000000000000000 | F | F | F |
| 0.7500000000000000  | 0.1214800030000021  | 0.1283199940000017 | F | F | F |
| 0.7473910900679257  | 0.8714099698962914  | 0.2488434506002349 | T | T | T |
| 0.5000000000000000  | 0.2464800030000021  | 0.0641599969999973 | F | F | F |
| 0.5055660457840713  | 0.0009624922602829  | 0.1902014868922850 | T | T | T |
| 0.5046124246975219  | 0.7559187132301844  | 0.3287087793921072 | T | T | T |
| 0.2500000000000000  | 0.1250000000000000  | 0.0018099999999990 | F | F | F |

|                    |                    |                    |   |   |   |
|--------------------|--------------------|--------------------|---|---|---|
| 0.2500000000000000 | 0.8750000000000000 | 0.1301199939999975 | F | F | F |
| 0.2575486027610918 | 0.6427692623040878 | 0.2629536887101755 | T | T | T |
| 0.7500000000000000 | 0.1250000000000000 | 0.0018099999999990 | F | F | F |
| 0.7500000000000000 | 0.8750000000000000 | 0.1301199939999975 | F | F | F |
| 0.7713631066276814 | 0.9326578451330968 | 0.3694273536736815 | T | T | T |

**Distal mechanism (state 18)**

Same as state 1 of distal mechanism

**Alternating mechanism (state 1-4)**

Same as state 1-4 of distal mechanism

**Alternating mechanism (state 5)**

|                    |                     |                     |
|--------------------|---------------------|---------------------|
| 1.0000000000000000 |                     |                     |
| 8.0600004195999997 | 0.0000000000000000  | 0.0000000000000000  |
| 0.0000000000000000 | 11.3985996245999992 | 0.0000000000000000  |
| 0.0000000000000000 | 0.0000000000000000  | 22.2077999115000004 |

|    |    |    |   |   |
|----|----|----|---|---|
| Ba | Ti | O  | H | N |
| 8  | 12 | 30 | 8 | 2 |

Selective dynamics

Direct

|                    |                    |                    |   |   |   |
|--------------------|--------------------|--------------------|---|---|---|
| 0.0000000000000000 | 0.5000000000000000 | 0.0659599970000002 | F | F | F |
| 0.9964289108591922 | 0.2548704249478851 | 0.1913309089827162 | T | T | T |
| 0.0000000000000000 | 0.0000000000000000 | 0.0659599970000002 | F | F | F |
| 0.0051123074702680 | 0.7529369739361939 | 0.1914757518003276 | T | T | T |
| 0.5000000000000000 | 0.5000000000000000 | 0.0659599970000002 | F | F | F |
| 0.4927304090302011 | 0.2568797366298936 | 0.1931389006910173 | T | T | T |
| 0.5000000000000000 | 0.0000000000000000 | 0.0659599970000002 | F | F | F |
| 0.4933201194204018 | 0.7507798462114544 | 0.1971268919473885 | T | T | T |
| 0.2500000000000000 | 0.7461799980000023 | 0.0640000029999968 | F | F | F |
| 0.2337153195589948 | 0.5050458415709461 | 0.1902009798733547 | T | T | T |
| 0.2332715560309367 | 0.2568423796039795 | 0.3125103705534902 | T | T | T |
| 0.2500000000000000 | 0.2538200019999977 | 0.0679299979999968 | F | F | F |
| 0.2349404752368747 | 0.0152502762996736 | 0.1958423372926237 | T | T | T |
| 0.2155702126131674 | 0.8509129381177885 | 0.3336116826489696 | T | T | T |
| 0.7500000000000000 | 0.7461799980000023 | 0.0640000029999968 | F | F | F |
| 0.7390992243147987 | 0.4981294654615700 | 0.1875093108718906 | T | T | T |
| 0.7446163322338368 | 0.2588758203396130 | 0.3110032223607724 | T | T | T |
| 0.7500000000000000 | 0.2538200019999977 | 0.0679299979999968 | F | F | F |
| 0.7337121542594981 | 0.0144456159972579 | 0.1960278610955068 | T | T | T |
| 0.7745186672753900 | 0.7821454078300606 | 0.3165705300793671 | T | T | T |
| 0.2500000000000000 | 0.6250000000000000 | 0.0018099999999990 | F | F | F |
| 0.2500000000000000 | 0.3750000000000000 | 0.1301199939999975 | F | F | F |
| 0.2500442777446176 | 0.1368822410897341 | 0.2565868577188590 | T | T | T |
| 0.2500000000000000 | 0.8785200120000027 | 0.0036100000000019 | F | F | F |
| 0.2500000000000000 | 0.6285200120000027 | 0.1319299939999965 | F | F | F |
| 0.2504492800801719 | 0.3760828554049145 | 0.2605090873849244 | T | T | T |
| 0.0000000000000000 | 0.7535200120000027 | 0.0677699969999992 | F | F | F |
| 0.0032344336794270 | 0.5063642868169020 | 0.1944189465693018 | T | T | T |
| 0.0106754480645539 | 0.2562705333239372 | 0.3313110767590007 | T | T | T |
| 0.2500000000000000 | 0.3714799879999973 | 0.0000000000000000 | F | F | F |
| 0.2500000000000000 | 0.1214800030000021 | 0.1283199940000017 | F | F | F |
| 0.2501019174731273 | 0.8786934160459786 | 0.2537950226730549 | T | T | T |

|                    |                     |                    |   |   |   |
|--------------------|---------------------|--------------------|---|---|---|
| 0.0000000000000000 | 0.2464800030000021  | 0.0641599969999973 | F | F | F |
| 0.0080688368942466 | 0.0006101926643878  | 0.1896935590385181 | T | T | T |
| 0.0027449630915409 | 0.7938453304222370  | 0.3437088853073222 | T | T | T |
| 0.7500000000000000 | 0.6250000000000000  | 0.0018099999999990 | F | F | F |
| 0.7500000000000000 | 0.3750000000000000  | 0.1301199939999975 | F | F | F |
| 0.7532302717374202 | 0.1350722436918336  | 0.2564397013181286 | T | T | T |
| 0.7500000000000000 | 0.8785200120000027  | 0.0036100000000019 | F | F | F |
| 0.7500000000000000 | 0.6285200120000027  | 0.1319299939999965 | F | F | F |
| 0.7544411051080693 | 0.3779044741699747  | 0.2574635538908804 | T | T | T |
| 0.5000000000000000 | 0.7535200120000027  | 0.0677699969999992 | F | F | F |
| 0.5106480610881980 | 0.5051911569319703  | 0.1947065547651808 | T | T | T |
| 0.5253087379348750 | 0.2537291180801754  | 0.3327481963009969 | T | T | T |
| 0.7500000000000000 | 0.3714799879999973  | 0.0000000000000000 | F | F | F |
| 0.7500000000000000 | 0.1214800030000021  | 0.1283199940000017 | F | F | F |
| 0.7561580567970204 | 0.8757423610934850  | 0.2509176343788285 | T | T | T |
| 0.5000000000000000 | 0.2464800030000021  | 0.0641599969999973 | F | F | F |
| 0.5059456667897708 | -0.0001326452066634 | 0.1904929012325558 | T | T | T |
| 0.2655206474433530 | 0.9884420995239944  | 0.3753981673009811 | T | T | T |
| 0.2500000000000000 | 0.1250000000000000  | 0.0018099999999990 | F | F | F |
| 0.2500000000000000 | 0.8750000000000000  | 0.1301199939999975 | F | F | F |
| 0.2538520601220133 | 0.6181270180787615  | 0.2483570727072791 | T | T | T |
| 0.7500000000000000 | 0.1250000000000000  | 0.0018099999999990 | F | F | F |
| 0.7500000000000000 | 0.8750000000000000  | 0.1301199939999975 | F | F | F |
| 0.7720475965028523 | 0.6530889502296685  | 0.2680110117380531 | T | T | T |
| 0.3763506627926040 | 0.0211466697833252  | 0.3690570288435328 | T | T | T |
| 0.3762728189096681 | 0.6515836670515621  | 0.3651086860799266 | T | T | T |
| 0.5598848417354013 | 0.7554939026926224  | 0.3429351321689736 | T | T | T |
| 0.4032796105838354 | 0.7375374581122801  | 0.3538412531599378 | T | T | T |

**Alternating mechanism (state 6)**

|                    |                     |                     |
|--------------------|---------------------|---------------------|
| 1.0000000000000000 |                     |                     |
| 8.0600004195999997 | 0.0000000000000000  | 0.0000000000000000  |
| 0.0000000000000000 | 11.3985996245999992 | 0.0000000000000000  |
| 0.0000000000000000 | 0.0000000000000000  | 22.2077999115000004 |

Ba Ti O H N  
8 12 30 8 2

Selective dynamics

Direct

|                    |                    |                    |   |   |   |
|--------------------|--------------------|--------------------|---|---|---|
| 0.0000000000000000 | 0.5000000000000000 | 0.0659599970000002 | F | F | F |
| 0.9977449801624014 | 0.2548879071307221 | 0.1908486557410372 | T | T | T |
| 0.0000000000000000 | 0.0000000000000000 | 0.0659599970000002 | F | F | F |
| 0.0056550097016499 | 0.7538033512882635 | 0.1922692569279205 | T | T | T |
| 0.5000000000000000 | 0.5000000000000000 | 0.0659599970000002 | F | F | F |
| 0.4920566512602001 | 0.2561384781464227 | 0.1931550482973009 | T | T | T |
| 0.5000000000000000 | 0.0000000000000000 | 0.0659599970000002 | F | F | F |
| 0.4940474411742275 | 0.7520291810448453 | 0.1970523347940752 | T | T | T |
| 0.2500000000000000 | 0.7461799980000023 | 0.0640000029999968 | F | F | F |
| 0.2341673399744891 | 0.5056386490418479 | 0.1901559854153179 | T | T | T |
| 0.2323151910467232 | 0.2551904388830362 | 0.3124561007937809 | T | T | T |
| 0.2500000000000000 | 0.2538200019999977 | 0.0679299979999968 | F | F | F |
| 0.2340733247751220 | 0.0152622045119490 | 0.1946509334506809 | T | T | T |
| 0.2544189584498884 | 0.8713433326907962 | 0.3338779917714164 | T | T | T |
| 0.7500000000000000 | 0.7461799980000023 | 0.0640000029999968 | F | F | F |

|                    |                     |                    |   |   |   |
|--------------------|---------------------|--------------------|---|---|---|
| 0.7402518343597501 | 0.4948356759772343  | 0.1859956314488720 | T | T | T |
| 0.7461967193414618 | 0.2572964635895158  | 0.3105356081925570 | T | T | T |
| 0.7500000000000000 | 0.2538200019999977  | 0.0679299979999968 | F | F | F |
| 0.7360833997934381 | 0.0140673954107665  | 0.1945518024906109 | T | T | T |
| 0.8051709623178570 | 0.8422173232897867  | 0.3307234644283849 | T | T | T |
| 0.2500000000000000 | 0.6250000000000000  | 0.0018099999999990 | F | F | F |
| 0.2500000000000000 | 0.3750000000000000  | 0.1301199939999975 | F | F | F |
| 0.2475311650044868 | 0.1374708520546351  | 0.2553612156197845 | T | T | T |
| 0.2500000000000000 | 0.8785200120000027  | 0.0036100000000019 | F | F | F |
| 0.2500000000000000 | 0.6285200120000027  | 0.1319299939999965 | F | F | F |
| 0.2498714962063059 | 0.3756265563629160  | 0.2610750011897439 | T | T | T |
| 0.0000000000000000 | 0.7535200120000027  | 0.0677699969999992 | F | F | F |
| 0.0012273833085805 | 0.5088822101672432  | 0.1960966870975896 | T | T | T |
| 0.0096070057231703 | 0.2541688136987147  | 0.3317151889874557 | T | T | T |
| 0.2500000000000000 | 0.3714799879999973  | 0.0000000000000000 | F | F | F |
| 0.2500000000000000 | 0.1214800030000021  | 0.1283199940000017 | F | F | F |
| 0.2550027040194677 | 0.8809828595873558  | 0.2517738945053729 | T | T | T |
| 0.0000000000000000 | 0.2464800030000021  | 0.0641599969999973 | F | F | F |
| 0.0064469931201591 | -0.0006689542246412 | 0.1893345610436491 | T | T | T |
| 0.0332224541577798 | 0.8305999832276859  | 0.3513772204853888 | T | T | T |
| 0.7500000000000000 | 0.6250000000000000  | 0.0018099999999990 | F | F | F |
| 0.7500000000000000 | 0.3750000000000000  | 0.1301199939999975 | F | F | F |
| 0.7567991441174002 | 0.1346031185219739  | 0.2561041108086912 | T | T | T |
| 0.7500000000000000 | 0.8785200120000027  | 0.0036100000000019 | F | F | F |
| 0.7500000000000000 | 0.6285200120000027  | 0.1319299939999965 | F | F | F |
| 0.7549227368587089 | 0.3788173642515553  | 0.2578875194401841 | T | T | T |
| 0.5000000000000000 | 0.7535200120000027  | 0.0677699969999992 | F | F | F |
| 0.5118849803620072 | 0.5065922724469062  | 0.1961982490684116 | T | T | T |
| 0.5259570655174924 | 0.2483280121151060  | 0.3320312598742990 | T | T | T |
| 0.7500000000000000 | 0.3714799879999973  | 0.0000000000000000 | F | F | F |
| 0.7500000000000000 | 0.1214800030000021  | 0.1283199940000017 | F | F | F |
| 0.7579139629882431 | 0.8725581267128817  | 0.2527515213402686 | T | T | T |
| 0.5000000000000000 | 0.2464800030000021  | 0.0641599969999973 | F | F | F |
| 0.5085547313701088 | -0.0005233643058489 | 0.1906254945484566 | T | T | T |
| 0.3221841470110903 | 0.0120828152739314  | 0.3677295573791660 | T | T | T |
| 0.2500000000000000 | 0.1250000000000000  | 0.0018099999999990 | F | F | F |
| 0.2500000000000000 | 0.8750000000000000  | 0.1301199939999975 | F | F | F |
| 0.2549970733190139 | 0.6187928628669045  | 0.2487538590572465 | T | T | T |
| 0.7500000000000000 | 0.1250000000000000  | 0.0018099999999990 | F | F | F |
| 0.7500000000000000 | 0.8750000000000000  | 0.1301199939999975 | F | F | F |
| 0.4198600629212141 | 0.0548698028490174  | 0.3529484481856694 | T | T | T |
| 0.4126672788445893 | 0.6730383309097869  | 0.3448599949072653 | T | T | T |
| 0.6179340332480132 | 0.7393761498055840  | 0.4109054862300852 | T | T | T |
| 0.6047572354507458 | 0.7774596102699555  | 0.3691406351550511 | T | T | T |
| 0.4402650951759324 | 0.7610146827199981  | 0.3485227314852004 | T | T | T |

**Alternating mechanism (state 7)**

|                    |                     |                     |
|--------------------|---------------------|---------------------|
| 1.0000000000000000 |                     |                     |
| 8.0600004195999997 | 0.0000000000000000  | 0.0000000000000000  |
| 0.0000000000000000 | 11.3985996245999992 | 0.0000000000000000  |
| 0.0000000000000000 | 0.0000000000000000  | 22.2077999115000004 |

Ba Ti O H N  
8 12 30 8 2

Selective dynamics

Direct

|                     |                    |                    |   |   |   |
|---------------------|--------------------|--------------------|---|---|---|
| 0.0000000000000000  | 0.5000000000000000 | 0.0659599970000002 | F | F | F |
| 0.9955944983235472  | 0.2535188235390368 | 0.1920683542927063 | T | T | T |
| 0.0000000000000000  | 0.0000000000000000 | 0.0659599970000002 | F | F | F |
| 0.0062104544252331  | 0.7538111970517021 | 0.2006460505867660 | T | T | T |
| 0.5000000000000000  | 0.5000000000000000 | 0.0659599970000002 | F | F | F |
| 0.4933418168021881  | 0.2563894723854587 | 0.1923779662981622 | T | T | T |
| 0.5000000000000000  | 0.0000000000000000 | 0.0659599970000002 | F | F | F |
| 0.4929373454618365  | 0.7508960468517856 | 0.1936385364250074 | T | T | T |
| 0.2500000000000000  | 0.7461799980000023 | 0.0640000029999968 | F | F | F |
| 0.2318216753661323  | 0.5043526471730828 | 0.1897202949726269 | T | T | T |
| 0.2394462251735435  | 0.2613525666992574 | 0.3123784042413009 | T | T | T |
| 0.2500000000000000  | 0.2538200019999977 | 0.0679299979999968 | F | F | F |
| 0.2357672233854439  | 0.0123909223963419 | 0.1991162746160638 | T | T | T |
| 0.2868385944666926  | 0.8284280279525030 | 0.3352881734618545 | T | T | T |
| 0.7500000000000000  | 0.7461799980000023 | 0.0640000029999968 | F | F | F |
| 0.7376662555137119  | 0.5024894391921799 | 0.1891873067650499 | T | T | T |
| 0.7406279962778469  | 0.2576978264199418 | 0.3119078492501964 | T | T | T |
| 0.7500000000000000  | 0.2538200019999977 | 0.0679299979999968 | F | F | F |
| 0.7314304410423531  | 0.0130825193424638 | 0.1969398128919476 | T | T | T |
| 0.7330858213476361  | 0.8049603186628260 | 0.3213725421588087 | T | T | T |
| 0.2500000000000000  | 0.6250000000000000 | 0.0018099999999990 | F | F | F |
| 0.2500000000000000  | 0.3750000000000000 | 0.1301199939999975 | F | F | F |
| 0.2516764737771004  | 0.1378070510752467 | 0.2580685520836222 | T | T | T |
| 0.2500000000000000  | 0.8785200120000027 | 0.0036100000000019 | F | F | F |
| 0.2500000000000000  | 0.6285200120000027 | 0.1319299939999965 | F | F | F |
| 0.2517098683961023  | 0.3801923924337149 | 0.2597586866210922 | T | T | T |
| 0.0000000000000000  | 0.7535200120000027 | 0.0677699969999992 | F | F | F |
| 0.0020900187743825  | 0.5073961620969960 | 0.1952855773033805 | T | T | T |
| 0.0184407490107344  | 0.2580234644302650 | 0.3324919847976178 | T | T | T |
| 0.2500000000000000  | 0.3714799879999973 | 0.0000000000000000 | F | F | F |
| 0.2500000000000000  | 0.1214800030000021 | 0.1283199940000017 | F | F | F |
| 0.2564057323839200  | 0.8798961710427918 | 0.2546949083858910 | T | T | T |
| 0.0000000000000000  | 0.2464800030000021 | 0.0641599969999973 | F | F | F |
| 0.0094096473152659  | 0.0000429573596100 | 0.1905052523468856 | T | T | T |
| -0.0766349092752660 | 0.8326069409994733 | 0.3550681064517356 | T | T | T |
| 0.7500000000000000  | 0.6250000000000000 | 0.0018099999999990 | F | F | F |
| 0.7500000000000000  | 0.3750000000000000 | 0.1301199939999975 | F | F | F |
| 0.7508390300887069  | 0.1346544140086439 | 0.2572931225471415 | T | T | T |
| 0.7500000000000000  | 0.8785200120000027 | 0.0036100000000019 | F | F | F |
| 0.7500000000000000  | 0.6285200120000027 | 0.1319299939999965 | F | F | F |
| 0.7547848160973873  | 0.3755178157739382 | 0.2585406273108533 | T | T | T |
| 0.5000000000000000  | 0.7535200120000027 | 0.0677699969999992 | F | F | F |
| 0.5105059636287173  | 0.5029445996164157 | 0.1932529571107583 | T | T | T |
| 0.5197192559951236  | 0.2582533183416731 | 0.3321794186149561 | T | T | T |
| 0.7500000000000000  | 0.3714799879999973 | 0.0000000000000000 | F | F | F |
| 0.7500000000000000  | 0.1214800030000021 | 0.1283199940000017 | F | F | F |
| 0.7484921061425431  | 0.8749341011858890 | 0.2461952074569256 | T | T | T |
| 0.5000000000000000  | 0.2464800030000021 | 0.0641599969999973 | F | F | F |
| 0.5043418132441639  | 0.0019716296470019 | 0.1893244277278896 | T | T | T |
| 0.5155038795959426  | 0.8425689323009917 | 0.3501307753013241 | T | T | T |
| 0.2500000000000000  | 0.1250000000000000 | 0.0018099999999990 | F | F | F |

|                    |                    |                    |   |   |   |
|--------------------|--------------------|--------------------|---|---|---|
| 0.2500000000000000 | 0.8750000000000000 | 0.1301199939999975 | F | F | F |
| 0.2706172736039730 | 0.6157119807212890 | 0.2421369580128863 | T | T | T |
| 0.7500000000000000 | 0.1250000000000000 | 0.0018099999999990 | F | F | F |
| 0.7500000000000000 | 0.8750000000000000 | 0.1301199939999975 | F | F | F |
| 0.2537333948511254 | 0.5900167465777030 | 0.3319436138252395 | T | T | T |
| 0.6391794557134615 | 0.5866281029591737 | 0.2989021575799220 | T | T | T |
| 0.8392924040105210 | 0.5872420144578490 | 0.3024115188641604 | T | T | T |
| 0.7414072259874056 | 0.6315438580650375 | 0.2832192506262927 | T | T | T |
| 0.2485829406618316 | 0.6790432318400567 | 0.3364416459729342 | T | T | T |

**Alternating mechanism (state 8)**

|                    |                     |                     |  |  |  |
|--------------------|---------------------|---------------------|--|--|--|
| 1.0000000000000000 |                     |                     |  |  |  |
| 8.0600004195999997 | 0.0000000000000000  | 0.0000000000000000  |  |  |  |
| 0.0000000000000000 | 11.3985996245999992 | 0.0000000000000000  |  |  |  |
| 0.0000000000000000 | 0.0000000000000000  | 22.2077999115000004 |  |  |  |

Ba Ti O H N  
8 12 30 8 2

Selective dynamics

Direct

|                    |                     |                    |   |   |   |
|--------------------|---------------------|--------------------|---|---|---|
| 0.0000000000000000 | 0.5000000000000000  | 0.0659599970000002 | F | F | F |
| 0.9960951931066830 | 0.2537891350386812  | 0.1914426070773630 | T | T | T |
| 0.0000000000000000 | 0.0000000000000000  | 0.0659599970000002 | F | F | F |
| 0.0016433658668822 | 0.7530294125507303  | 0.1905994215674373 | T | T | T |
| 0.5000000000000000 | 0.5000000000000000  | 0.0659599970000002 | F | F | F |
| 0.4961257942792748 | 0.2540028855146050  | 0.1915582546635444 | T | T | T |
| 0.5000000000000000 | 0.0000000000000000  | 0.0659599970000002 | F | F | F |
| 0.4988670666613720 | 0.7527277049169409  | 0.1890003696274575 | T | T | T |
| 0.2500000000000000 | 0.7461799980000023  | 0.0640000029999968 | F | F | F |
| 0.2381079389250292 | 0.5003812159631988  | 0.1877957953409170 | T | T | T |
| 0.2420887085151610 | 0.2540493013595934  | 0.3116616323248197 | T | T | T |
| 0.2500000000000000 | 0.2538200019999977  | 0.0679299979999968 | F | F | F |
| 0.2365946253283777 | 0.0137424883693865  | 0.1946536361446746 | T | T | T |
| 0.2755633511975756 | 0.7803109405735026  | 0.3182896426421543 | T | T | T |
| 0.7500000000000000 | 0.7461799980000023  | 0.0640000029999968 | F | F | F |
| 0.7382370470460223 | 0.5007064360109745  | 0.1875156789936643 | T | T | T |
| 0.7426918053520307 | 0.2531759185594639  | 0.3115817884034501 | T | T | T |
| 0.7500000000000000 | 0.2538200019999977  | 0.0679299979999968 | F | F | F |
| 0.7360939764967533 | 0.0134005755864381  | 0.1943493151540742 | T | T | T |
| 0.7577595000079715 | 0.7778272775110062  | 0.3162362284256969 | T | T | T |
| 0.2500000000000000 | 0.6250000000000000  | 0.0018099999999990 | F | F | F |
| 0.2500000000000000 | 0.3750000000000000  | 0.1301199939999975 | F | F | F |
| 0.2534617166152635 | 0.1313742198506916  | 0.2577113155779288 | T | T | T |
| 0.2500000000000000 | 0.8785200120000027  | 0.0036100000000019 | F | F | F |
| 0.2500000000000000 | 0.6285200120000027  | 0.1319299939999965 | F | F | F |
| 0.2545441348768171 | 0.3722030602427508  | 0.2583616912426308 | T | T | T |
| 0.0000000000000000 | 0.7535200120000027  | 0.0677699969999992 | F | F | F |
| 0.0058939465410767 | 0.5045696496792486  | 0.1949384941213225 | T | T | T |
| 0.0200557372446775 | 0.2540528848590871  | 0.3329353125885531 | T | T | T |
| 0.2500000000000000 | 0.3714799879999973  | 0.0000000000000000 | F | F | F |
| 0.2500000000000000 | 0.1214800030000021  | 0.1283199940000017 | F | F | F |
| 0.2550042751142387 | 0.8722173769724539  | 0.2536062623792463 | T | T | T |
| 0.0000000000000000 | 0.2464800030000021  | 0.0641599969999973 | F | F | F |
| 0.0083378578202660 | -0.0027003073820117 | 0.1901496146071590 | T | T | T |



|                    |                     |                    |   |   |   |
|--------------------|---------------------|--------------------|---|---|---|
| 0.9773284725737453 | 0.7715963496072709  | 0.3352976847946139 | T | T | T |
| 0.7500000000000000 | 0.6250000000000000  | 0.0018099999999990 | F | F | F |
| 0.7500000000000000 | 0.3750000000000000  | 0.1301199939999975 | F | F | F |
| 0.7539806749947262 | 0.1296852095232296  | 0.2578057349104740 | T | T | T |
| 0.7500000000000000 | 0.8785200120000027  | 0.0036100000000019 | F | F | F |
| 0.7500000000000000 | 0.6285200120000027  | 0.1319299939999965 | F | F | F |
| 0.7542436453335192 | 0.3708755407068687  | 0.2581099801112208 | T | T | T |
| 0.5000000000000000 | 0.7535200120000027  | 0.0677699969999992 | F | F | F |
| 0.5055863993417169 | 0.5047533100033276  | 0.1949471812316626 | T | T | T |
| 0.5208750776190658 | 0.2534446233617595  | 0.3329465636829996 | T | T | T |
| 0.7500000000000000 | 0.3714799879999973  | 0.0000000000000000 | F | F | F |
| 0.7500000000000000 | 0.1214800030000021  | 0.1283199940000017 | F | F | F |
| 0.7517321155383510 | 0.8682139491815924  | 0.2505583614530744 | T | T | T |
| 0.5000000000000000 | 0.2464800030000021  | 0.0641599969999973 | F | F | F |
| 0.5076226218421733 | -0.0019036089380317 | 0.1899343658436195 | T | T | T |
| 0.5030260933055618 | 0.7730135288936862  | 0.3359469914107770 | T | T | T |
| 0.2500000000000000 | 0.1250000000000000  | 0.0018099999999990 | F | F | F |
| 0.2500000000000000 | 0.8750000000000000  | 0.1301199939999975 | F | F | F |
| 0.7500000000000000 | 0.1250000000000000  | 0.0018099999999990 | F | F | F |
| 0.7500000000000000 | 0.8750000000000000  | 0.1301199939999975 | F | F | F |
| 0.3482103616220249 | 0.5644164604011462  | 0.2932245926712980 | T | T | T |
| 0.6454648802005011 | 0.5732902366447229  | 0.2931115163843089 | T | T | T |
| 0.8463525418652046 | 0.5654589262411541  | 0.2938061847626756 | T | T | T |
| 0.1482342819217451 | 0.5767082499626704  | 0.2962739520487624 | T | T | T |
| 0.7499261663339241 | 0.6136086427538217  | 0.2765100175654829 | T | T | T |
| 0.2520189418864029 | 0.6161827644695030  | 0.2785555642988779 | T | T | T |

**Alternating mechanism (state 9)**

1.0000000000000000  
8.0600004195999997 0.0000000000000000 0.0000000000000000  
0.0000000000000000 11.3985996245999992 0.0000000000000000  
0.0000000000000000 0.0000000000000000 22.2077999115000004

Ba Ti O H N  
8 12 30 10 2

**Selective dynamics**

**Direct**

|                     |                    |                    |   |   |   |
|---------------------|--------------------|--------------------|---|---|---|
| 0.0000000000000000  | 0.5000000000000000 | 0.0659599970000002 | F | F | F |
| 0.9964825761828093  | 0.2543469170819956 | 0.1913663693280870 | T | T | T |
| 0.0000000000000000  | 0.0000000000000000 | 0.0659599970000002 | F | F | F |
| -0.0009826331785285 | 0.7524858416037989 | 0.1889087947334789 | T | T | T |
| 0.5000000000000000  | 0.5000000000000000 | 0.0659599970000002 | F | F | F |
| 0.4957223249611635  | 0.2540049577770540 | 0.1914862625838635 | T | T | T |
| 0.5000000000000000  | 0.0000000000000000 | 0.0659599970000002 | F | F | F |
| 0.5014286898407253  | 0.7531089830202773 | 0.1906650616912607 | T | T | T |
| 0.2500000000000000  | 0.7461799980000023 | 0.0640000029999968 | F | F | F |
| 0.2384453073148631  | 0.5007843497021643 | 0.1874625525714543 | T | T | T |
| 0.2419409762903006  | 0.2532276182697529 | 0.3116942746973297 | T | T | T |
| 0.2500000000000000  | 0.2538200019999977 | 0.0679299979999968 | F | F | F |
| 0.2357602899142474  | 0.0134677650211866 | 0.1942598660965218 | T | T | T |
| 0.2558756022776879  | 0.7780828446073937 | 0.3159885019079016 | T | T | T |
| 0.7500000000000000  | 0.7461799980000023 | 0.0640000029999968 | F | F | F |
| 0.7386231652895404  | 0.5001578102263924 | 0.1875651997159565 | T | T | T |
| 0.7424979118914021  | 0.2541791825312556 | 0.3116685074192959 | T | T | T |

|                    |                    |                    |   |   |   |
|--------------------|--------------------|--------------------|---|---|---|
| 0.7500000000000000 | 0.2538200019999977 | 0.0679299979999968 | F | F | F |
| 0.7370076489402041 | 0.0144720165122371 | 0.1944187811653163 | T | T | T |
| 0.7739602958153313 | 0.7798987816798177 | 0.3189687636216492 | T | T | T |
| 0.2500000000000000 | 0.6250000000000000 | 0.0018099999999990 | F | F | F |
| 0.2500000000000000 | 0.3750000000000000 | 0.1301199939999975 | F | F | F |
| 0.2534853212148003 | 0.1298866662779060 | 0.2579250910970092 | T | T | T |
| 0.2500000000000000 | 0.8785200120000027 | 0.0036100000000019 | F | F | F |
| 0.2500000000000000 | 0.6285200120000027 | 0.1319299939999965 | F | F | F |
| 0.2538073655119548 | 0.3708621012651077 | 0.2582995340675061 | T | T | T |
| 0.0000000000000000 | 0.7535200120000027 | 0.0677699969999992 | F | F | F |
| 0.0053577776955086 | 0.5046246572831178 | 0.1949103661356335 | T | T | T |
| 0.0199832677742297 | 0.2537561106931918 | 0.3332894545563625 | T | T | T |
| 0.2500000000000000 | 0.3714799879999973 | 0.0000000000000000 | F | F | F |
| 0.2500000000000000 | 0.1214800030000021 | 0.1283199940000017 | F | F | F |
| 0.2514599056359680 | 0.8687857795445616 | 0.2503837103862646 | T | T | T |
| 0.0000000000000000 | 0.2464800030000021 | 0.0641599969999973 | F | F | F |
| 0.0070175993394733 | 0.9980506026855553 | 0.1899512097928094 | T | T | T |
| 0.0030886368380798 | 0.7723792648312691 | 0.3351323824687638 | T | T | T |
| 0.7500000000000000 | 0.6250000000000000 | 0.0018099999999990 | F | F | F |
| 0.7500000000000000 | 0.3750000000000000 | 0.1301199939999975 | F | F | F |
| 0.7538862696363590 | 0.1314326155911290 | 0.2576688445041592 | T | T | T |
| 0.7500000000000000 | 0.8785200120000027 | 0.0036100000000019 | F | F | F |
| 0.7500000000000000 | 0.6285200120000027 | 0.1319299939999965 | F | F | F |
| 0.7544783378806029 | 0.3724109570702017 | 0.2584370016473128 | T | T | T |
| 0.5000000000000000 | 0.7535200120000027 | 0.0677699969999992 | F | F | F |
| 0.5060764575134994 | 0.5046968433101017 | 0.1950913984759134 | T | T | T |
| 0.5207407185259941 | 0.2539068817870535 | 0.3332410851968102 | T | T | T |
| 0.7500000000000000 | 0.3714799879999973 | 0.0000000000000000 | F | F | F |
| 0.7500000000000000 | 0.1214800030000021 | 0.1283199940000017 | F | F | F |
| 0.7552119203062598 | 0.8708742599776864 | 0.2542806703152461 | T | T | T |
| 0.5000000000000000 | 0.2464800030000021 | 0.0641599969999973 | F | F | F |
| 0.5087968190771218 | 0.9974531160595584 | 0.1902805932686230 | T | T | T |
| 0.4760499933532275 | 0.7714079980932100 | 0.3358893767742266 | T | T | T |
| 0.2500000000000000 | 0.1250000000000000 | 0.0018099999999990 | F | F | F |
| 0.2500000000000000 | 0.8750000000000000 | 0.1301199939999975 | F | F | F |
| 0.7500000000000000 | 0.1250000000000000 | 0.0018099999999990 | F | F | F |
| 0.7500000000000000 | 0.8750000000000000 | 0.1301199939999975 | F | F | F |
| 0.3470657132999818 | 0.5665507369292180 | 0.2932612642101480 | T | T | T |
| 0.6474989111221979 | 0.5777455198169048 | 0.2955235900368743 | T | T | T |
| 0.8478163374047355 | 0.5642429598126540 | 0.2936486987739563 | T | T | T |
| 0.1463730033884047 | 0.5720598432694005 | 0.2926980966542865 | T | T | T |
| 0.6676690146767373 | 0.7867905939625432 | 0.4120699946886073 | T | T | T |
| 0.7593584896751036 | 0.7859376354867724 | 0.4217238330078116 | T | T | T |
| 0.7528460644387921 | 0.6169723587606125 | 0.2789396838888529 | T | T | T |
| 0.2496032019966752 | 0.6136471611904902 | 0.2760021366958183 | T | T | T |

**Alternating mechanism (state 10)**

|                    |                     |                     |
|--------------------|---------------------|---------------------|
| 1.0000000000000000 |                     |                     |
| 8.0600004195999997 | 0.0000000000000000  | 0.0000000000000000  |
| 0.0000000000000000 | 11.3985996245999992 | 0.0000000000000000  |
| 0.0000000000000000 | 0.0000000000000000  | 22.2077999115000004 |

Ba Ti O H N  
8 12 30 10 2

Selective dynamics

Direct

|                     |                    |                    |   |   |   |
|---------------------|--------------------|--------------------|---|---|---|
| 0.0000000000000000  | 0.5000000000000000 | 0.0659599970000002 | F | F | F |
| 0.9969734300890211  | 0.2536218579639054 | 0.1911984667858451 | T | T | T |
| 0.0000000000000000  | 0.0000000000000000 | 0.0659599970000002 | F | F | F |
| -0.0009858582194091 | 0.7519380864073797 | 0.1864660827851882 | T | T | T |
| 0.5000000000000000  | 0.5000000000000000 | 0.0659599970000002 | F | F | F |
| 0.4957401476553240  | 0.2538454012180380 | 0.1913857019950259 | T | T | T |
| 0.5000000000000000  | 0.0000000000000000 | 0.0659599970000002 | F | F | F |
| 0.5010816638510190  | 0.7523619931486234 | 0.1882301739413389 | T | T | T |
| 0.2500000000000000  | 0.7461799980000023 | 0.0640000029999968 | F | F | F |
| 0.2387911845960453  | 0.4997317096302759 | 0.1876088499034915 | T | T | T |
| 0.2416848876906478  | 0.2539809004548418 | 0.3115898675225951 | T | T | T |
| 0.2500000000000000  | 0.2538200019999977 | 0.0679299979999968 | F | F | F |
| 0.2374278939551820  | 0.0139862038754899 | 0.1943905643675437 | T | T | T |
| 0.2321017432035921  | 0.7774533120342804 | 0.3174691681910434 | T | T | T |
| 0.7500000000000000  | 0.7461799980000023 | 0.0640000029999968 | F | F | F |
| 0.7397559956092167  | 0.4979972625436126 | 0.1875566418831041 | T | T | T |
| 0.7427520978209211  | 0.2554364457972934 | 0.3114376235869714 | T | T | T |
| 0.7500000000000000  | 0.2538200019999977 | 0.0679299979999968 | F | F | F |
| 0.7367599897218808  | 0.0151424513961414 | 0.1944335333162151 | T | T | T |
| 0.7886544174120608  | 0.7849256829673333 | 0.3201032632064624 | T | T | T |
| 0.2500000000000000  | 0.6250000000000000 | 0.0018099999999990 | F | F | F |
| 0.2500000000000000  | 0.3750000000000000 | 0.1301199939999975 | F | F | F |
| 0.2534495231164924  | 0.1309294104157722 | 0.2575964906531091 | T | T | T |
| 0.2500000000000000  | 0.8785200120000027 | 0.0036100000000019 | F | F | F |
| 0.2500000000000000  | 0.6285200120000027 | 0.1319299939999965 | F | F | F |
| 0.2536184131051534  | 0.3719126781945684 | 0.2579807614372800 | T | T | T |
| 0.0000000000000000  | 0.7535200120000027 | 0.0677699969999992 | F | F | F |
| 0.0051570375271291  | 0.5062069541026030 | 0.1955384627100804 | T | T | T |
| 0.0199888372795175  | 0.2548232183124250 | 0.3323762985149875 | T | T | T |
| 0.2500000000000000  | 0.3714799879999973 | 0.0000000000000000 | F | F | F |
| 0.2500000000000000  | 0.1214800030000021 | 0.1283199940000017 | F | F | F |
| 0.2608200404591409  | 0.8692292393877837 | 0.2532733555670060 | T | T | T |
| 0.0000000000000000  | 0.2464800030000021 | 0.0641599969999973 | F | F | F |
| 0.0082918827596812  | 0.9959884410556360 | 0.1908026422976875 | T | T | T |
| 0.0082135110367902  | 0.7750027676917871 | 0.3387910962977901 | T | T | T |
| 0.7500000000000000  | 0.6250000000000000 | 0.0018099999999990 | F | F | F |
| 0.7500000000000000  | 0.3750000000000000 | 0.1301199939999975 | F | F | F |
| 0.7537925373538483  | 0.1332642264081015 | 0.2569572130104671 | T | T | T |
| 0.7500000000000000  | 0.8785200120000027 | 0.0036100000000019 | F | F | F |
| 0.7500000000000000  | 0.6285200120000027 | 0.1319299939999965 | F | F | F |
| 0.7563486284632711  | 0.3748377237726614 | 0.2583341314958750 | T | T | T |
| 0.5000000000000000  | 0.7535200120000027 | 0.0677699969999992 | F | F | F |
| 0.5068027311524721  | 0.5051961860513401 | 0.1955772547737019 | T | T | T |
| 0.5213489459230810  | 0.2560022596338548 | 0.3319774591737775 | T | T | T |
| 0.7500000000000000  | 0.3714799879999973 | 0.0000000000000000 | F | F | F |
| 0.7500000000000000  | 0.1214800030000021 | 0.1283199940000017 | F | F | F |
| 0.7500778321376492  | 0.8728524487400939 | 0.2555854777857796 | T | T | T |
| 0.5000000000000000  | 0.2464800030000021 | 0.0641599969999973 | F | F | F |
| 0.5082475144522749  | 0.9973242312178346 | 0.1900684224779669 | T | T | T |
| 0.3899388099964020  | 0.7836480880974764 | 0.3758741093079807 | T | T | T |
| 0.2500000000000000  | 0.1250000000000000 | 0.0018099999999990 | F | F | F |

|                    |                    |                    |   |   |   |
|--------------------|--------------------|--------------------|---|---|---|
| 0.2500000000000000 | 0.8750000000000000 | 0.1301199939999975 | F | F | F |
| 0.7500000000000000 | 0.1250000000000000 | 0.0018099999999990 | F | F | F |
| 0.7500000000000000 | 0.8750000000000000 | 0.1301199939999975 | F | F | F |
| 0.3555330286578798 | 0.5701364071384549 | 0.2933109959979966 | T | T | T |
| 0.6304805906817705 | 0.5851909339554384 | 0.2958988079463538 | T | T | T |
| 0.8275077674230839 | 0.5625378910505967 | 0.3010812361574096 | T | T | T |
| 0.1568331573263204 | 0.5649869577738734 | 0.2946611709420751 | T | T | T |
| 0.5038293257071247 | 0.8176518747347401 | 0.3816021928000473 | T | T | T |
| 0.6785057044378678 | 0.8409813821619786 | 0.3824582565973986 | T | T | T |
| 0.7427872260252809 | 0.6224039323885949 | 0.2851606697667389 | T | T | T |
| 0.2530617883211932 | 0.6141291067299659 | 0.2775675368644234 | T | T | T |

**Alternating mechanism (state 11)**

|                    |                     |                     |  |  |  |
|--------------------|---------------------|---------------------|--|--|--|
| 1.0000000000000000 |                     |                     |  |  |  |
| 8.0600004195999997 | 0.0000000000000000  | 0.0000000000000000  |  |  |  |
| 0.0000000000000000 | 11.3985996245999992 | 0.0000000000000000  |  |  |  |
| 0.0000000000000000 | 0.0000000000000000  | 22.2077999115000004 |  |  |  |

Ba Ti O H N  
8 12 30 10 2

Selective dynamics

Direct

|                     |                    |                    |   |   |   |
|---------------------|--------------------|--------------------|---|---|---|
| 0.0000000000000000  | 0.5000000000000000 | 0.0659599970000002 | F | F | F |
| -0.0007988793480576 | 0.2536476395917889 | 0.1913410788068633 | T | T | T |
| 0.0000000000000000  | 0.0000000000000000 | 0.0659599970000002 | F | F | F |
| -0.0000047037341055 | 0.7549444165202929 | 0.1872017277909120 | T | T | T |
| 0.5000000000000000  | 0.5000000000000000 | 0.0659599970000002 | F | F | F |
| 0.4942624374815400  | 0.2529125796641835 | 0.1916606127257547 | T | T | T |
| 0.5000000000000000  | 0.0000000000000000 | 0.0659599970000002 | F | F | F |
| 0.4994484835547203  | 0.7547090016012722 | 0.1893570897454942 | T | T | T |
| 0.2500000000000000  | 0.7461799980000023 | 0.0640000029999968 | F | F | F |
| 0.2382936050282380  | 0.5009638820410234 | 0.1877329720761118 | T | T | T |
| 0.2413894848319088  | 0.2558958573828655 | 0.3116310851079588 | T | T | T |
| 0.2500000000000000  | 0.2538200019999977 | 0.0679299979999968 | F | F | F |
| 0.2365116166510147  | 0.0138003909546729 | 0.1950471106171670 | T | T | T |
| 0.2414388148299604  | 0.7800739463243535 | 0.3163694516127100 | T | T | T |
| 0.7500000000000000  | 0.7461799980000023 | 0.0640000029999968 | F | F | F |
| 0.7422862923275250  | 0.4945021809643730 | 0.1855349127794012 | T | T | T |
| 0.7435346524292678  | 0.2604349017820954 | 0.3112413871758021 | T | T | T |
| 0.7500000000000000  | 0.2538200019999977 | 0.0679299979999968 | F | F | F |
| 0.7395759936886731  | 0.0166242515927219 | 0.1942722915781961 | T | T | T |
| 0.7904677000264776  | 0.8150749352406986 | 0.3328402275940824 | T | T | T |
| 0.2500000000000000  | 0.6250000000000000 | 0.0018099999999990 | F | F | F |
| 0.2500000000000000  | 0.3750000000000000 | 0.1301199939999975 | F | F | F |
| 0.2527488896551506  | 0.1321977626978201 | 0.2578231781663340 | T | T | T |
| 0.2500000000000000  | 0.8785200120000027 | 0.0036100000000019 | F | F | F |
| 0.2500000000000000  | 0.6285200120000027 | 0.1319299939999965 | F | F | F |
| 0.2535080959564722  | 0.3728767331325658 | 0.2573660335380992 | T | T | T |
| 0.0000000000000000  | 0.7535200120000027 | 0.0677699969999992 | F | F | F |
| 0.0016537821986780  | 0.5085413718125926 | 0.1957852661564148 | T | T | T |
| 0.0197466087175961  | 0.2577227962497966 | 0.3323936882856582 | T | T | T |
| 0.2500000000000000  | 0.3714799879999973 | 0.0000000000000000 | F | F | F |
| 0.2500000000000000  | 0.1214800030000021 | 0.1283199940000017 | F | F | F |
| 0.2521603446092484  | 0.8701431796047288 | 0.2495627112048969 | T | T | T |

|                    |                     |                    |   |   |   |
|--------------------|---------------------|--------------------|---|---|---|
| 0.0000000000000000 | 0.2464800030000021  | 0.0641599969999973 | F | F | F |
| 0.0046823403332448 | -0.0008947945927068 | 0.1911951170124704 | T | T | T |
| 0.0101578280404103 | 0.7893725912719765  | 0.3445595531888135 | T | T | T |
| 0.7500000000000000 | 0.6250000000000000  | 0.0018099999999990 | F | F | F |
| 0.7500000000000000 | 0.3750000000000000  | 0.1301199939999975 | F | F | F |
| 0.7536872400217710 | 0.1397760207647560  | 0.2558653374692519 | T | T | T |
| 0.7500000000000000 | 0.8785200120000027  | 0.0036100000000019 | F | F | F |
| 0.7500000000000000 | 0.6285200120000027  | 0.1319299939999965 | F | F | F |
| 0.7584088761135147 | 0.3870100287673482  | 0.2609284962557411 | T | T | T |
| 0.5000000000000000 | 0.7535200120000027  | 0.0677699969999992 | F | F | F |
| 0.5105429311844946 | 0.5092043490045083  | 0.1978552514590333 | T | T | T |
| 0.5224899363340394 | 0.2602250713734373  | 0.3320359619666354 | T | T | T |
| 0.7500000000000000 | 0.3714799879999973  | 0.0000000000000000 | F | F | F |
| 0.7500000000000000 | 0.1214800030000021  | 0.1283199940000017 | F | F | F |
| 0.7563967774198734 | 0.8587683212932168  | 0.2571019730424450 | T | T | T |
| 0.5000000000000000 | 0.2464800030000021  | 0.0641599969999973 | F | F | F |
| 0.5105021167731684 | 0.9979668797859614  | 0.1913608345591493 | T | T | T |
| 0.4375344011405268 | 0.7788417650988834  | 0.3510033397481084 | T | T | T |
| 0.2500000000000000 | 0.1250000000000000  | 0.0018099999999990 | F | F | F |
| 0.2500000000000000 | 0.8750000000000000  | 0.1301199939999975 | F | F | F |
| 0.7500000000000000 | 0.1250000000000000  | 0.0018099999999990 | F | F | F |
| 0.7500000000000000 | 0.8750000000000000  | 0.1301199939999975 | F | F | F |
| 0.3375335707354464 | 0.5665848627257686  | 0.2945970715393312 | T | T | T |
| 0.5752035411112094 | 0.6595813385482858  | 0.3556145671453239 | T | T | T |
| 0.7465974896515566 | 0.6042119190956364  | 0.3892599511812363 | T | T | T |
| 0.1373932501216840 | 0.5711347547488826  | 0.2912163182301598 | T | T | T |
| 0.7512320485281766 | 0.9333754319019487  | 0.3783792630043843 | T | T | T |
| 0.7095152517950218 | 0.5684787626618857  | 0.3189632722889725 | T | T | T |
| 0.7001821543906682 | 0.6360381337489696  | 0.3495785059833770 | T | T | T |
| 0.2418352735369201 | 0.6149148587681079  | 0.2768884475244067 | T | T | T |

**Alternating mechanism (state 12)**

1.0000000000000000  
8.0600004195999997 0.0000000000000000 0.0000000000000000  
0.0000000000000000 11.3985996245999992 0.0000000000000000  
0.0000000000000000 0.0000000000000000 22.2077999115000004

Ba Ti O H N  
8 12 30 12 2

**Selective dynamics**

**Direct**

|                    |                    |                    |   |   |   |
|--------------------|--------------------|--------------------|---|---|---|
| 0.0000000000000000 | 0.5000000000000000 | 0.0659599970000002 | F | F | F |
| 0.9990609574017705 | 0.2536329675840600 | 0.1913660494979484 | T | T | T |
| 0.0000000000000000 | 0.0000000000000000 | 0.0659599970000002 | F | F | F |
| 0.9997304794550723 | 0.7549509766647404 | 0.1872346873340412 | T | T | T |
| 0.5000000000000000 | 0.5000000000000000 | 0.0659599970000002 | F | F | F |
| 0.4942045262866085 | 0.2529513510521134 | 0.1916944134325222 | T | T | T |
| 0.5000000000000000 | 0.0000000000000000 | 0.0659599970000002 | F | F | F |
| 0.4990235477683357 | 0.7546701505936244 | 0.1892297920850444 | T | T | T |
| 0.2500000000000000 | 0.7461799980000023 | 0.0640000029999968 | F | F | F |
| 0.2382614379644466 | 0.5009301113263840 | 0.1877322473190378 | T | T | T |
| 0.2412555380044752 | 0.2560136947574972 | 0.3116201306655131 | T | T | T |
| 0.2500000000000000 | 0.2538200019999977 | 0.0679299979999968 | F | F | F |
| 0.2363864469295065 | 0.0139069397428818 | 0.1950023400069264 | T | T | T |

|                    |                    |                    |   |   |   |
|--------------------|--------------------|--------------------|---|---|---|
| 0.2407250595427635 | 0.7806598703532480 | 0.3163149971353207 | T | T | T |
| 0.7500000000000000 | 0.7461799980000023 | 0.0640000029999968 | F | F | F |
| 0.7422098186399587 | 0.4944329082679394 | 0.1855803170486193 | T | T | T |
| 0.7434484029290004 | 0.2604146307785883 | 0.3112332269282953 | T | T | T |
| 0.7500000000000000 | 0.2538200019999977 | 0.0679299979999968 | F | F | F |
| 0.7393407406062024 | 0.0166696693713426 | 0.1942424134193018 | T | T | T |
| 0.7883321806728599 | 0.8163255271027030 | 0.3325562585268038 | T | T | T |
| 0.2500000000000000 | 0.6250000000000000 | 0.0018099999999990 | F | F | F |
| 0.2500000000000000 | 0.3750000000000000 | 0.1301199939999975 | F | F | F |
| 0.2525584116829572 | 0.1322789030830795 | 0.2578119731175978 | T | T | T |
| 0.2500000000000000 | 0.8785200120000027 | 0.0036100000000019 | F | F | F |
| 0.2500000000000000 | 0.6285200120000027 | 0.1319299939999965 | F | F | F |
| 0.2534695694755226 | 0.3730719005034770 | 0.2573847660921278 | T | T | T |
| 0.0000000000000000 | 0.7535200120000027 | 0.0677699969999992 | F | F | F |
| 0.0016699345525247 | 0.5085378426074149 | 0.1958442735206719 | T | T | T |
| 0.0196466898242258 | 0.2578010399255498 | 0.3323446271059155 | T | T | T |
| 0.2500000000000000 | 0.3714799879999973 | 0.0000000000000000 | F | F | F |
| 0.2500000000000000 | 0.1214800030000021 | 0.1283199940000017 | F | F | F |
| 0.2519896031345342 | 0.8701431357465153 | 0.2494537123524250 | T | T | T |
| 0.0000000000000000 | 0.2464800030000021 | 0.0641599969999973 | F | F | F |
| 0.0044916315560948 | 0.9991400724431126 | 0.1912105553433441 | T | T | T |
| 0.0080664624732461 | 0.7901895020532289 | 0.3436451558959113 | T | T | T |
| 0.7500000000000000 | 0.6250000000000000 | 0.0018099999999990 | F | F | F |
| 0.7500000000000000 | 0.3750000000000000 | 0.1301199939999975 | F | F | F |
| 0.7535944693841000 | 0.1397388599200159 | 0.2558871790706226 | T | T | T |
| 0.7500000000000000 | 0.8785200120000027 | 0.0036100000000019 | F | F | F |
| 0.7500000000000000 | 0.6285200120000027 | 0.1319299939999965 | F | F | F |
| 0.7582937237203808 | 0.3868582864237385 | 0.2608820805420604 | T | T | T |
| 0.5000000000000000 | 0.7535200120000027 | 0.0677699969999992 | F | F | F |
| 0.5104535597440928 | 0.5092646414312172 | 0.1978784040325013 | T | T | T |
| 0.5223810607120886 | 0.2602494669301577 | 0.3320016628958617 | T | T | T |
| 0.7500000000000000 | 0.3714799879999973 | 0.0000000000000000 | F | F | F |
| 0.7500000000000000 | 0.1214800030000021 | 0.1283199940000017 | F | F | F |
| 0.7546600425172421 | 0.8588939711805142 | 0.2566929009483155 | T | T | T |
| 0.5000000000000000 | 0.2464800030000021 | 0.0641599969999973 | F | F | F |
| 0.5100651884013095 | 0.9982456993431588 | 0.1913501516209146 | T | T | T |
| 0.4364308489534712 | 0.7809131564119752 | 0.3512162105234504 | T | T | T |
| 0.2500000000000000 | 0.1250000000000000 | 0.0018099999999990 | F | F | F |
| 0.2500000000000000 | 0.8750000000000000 | 0.1301199939999975 | F | F | F |
| 0.7500000000000000 | 0.1250000000000000 | 0.0018099999999990 | F | F | F |
| 0.7500000000000000 | 0.8750000000000000 | 0.1301199939999975 | F | F | F |
| 0.3374181367343868 | 0.5668669914077954 | 0.2948095578580763 | T | T | T |
| 0.5730228958351345 | 0.6620623235529373 | 0.3571342409570286 | T | T | T |
| 0.7059266847046120 | 0.5702337888963344 | 0.3202860061889796 | T | T | T |
| 0.1373099390495090 | 0.5715855244909810 | 0.2913326263445522 | T | T | T |
| 0.7525643982329232 | 0.9359245473279817 | 0.3775810166021181 | T | T | T |
| 0.7454036005982076 | 0.6067221393279822 | 0.3903854744867387 | T | T | T |
| 0.0565299043626425 | 0.8200839024313730 | 0.4526460231524774 | T | T | T |
| 0.0953505187796673 | 0.8180310084160047 | 0.4834666322099783 | T | T | T |
| 0.6977756219117953 | 0.6380141406773906 | 0.3507840745389231 | T | T | T |
| 0.2418823320211502 | 0.6153354279590399 | 0.2770820470064856 | T | T | T |

**Alternating mechanism (state 13)**

```

1.0000000000000000
 8.060000419599997  0.000000000000000  0.000000000000000
 0.000000000000000  11.398599624599992  0.000000000000000
 0.000000000000000  0.000000000000000  22.207799911500004
Ba Ti O H N
 8 12 30 12 2
Selective dynamics
Direct
0.000000000000000 0.500000000000000 0.0659599970000002 F F F
0.9986118672544638 0.2532614088890545 0.1908314887927154 T T T
0.000000000000000 0.000000000000000 0.0659599970000002 F F F
0.0036127965823032 0.7557798001670061 0.1904691325764100 T T T
0.500000000000000 0.500000000000000 0.0659599970000002 F F F
0.4943932489871228 0.2535081294006748 0.1918324267432522 T T T
0.500000000000000 0.000000000000000 0.0659599970000002 F F F
0.4971820736322211 0.7540137439700144 0.1880906207577910 T T T
0.250000000000000 0.7461799980000023 0.0640000029999968 F F F
0.2373868695188715 0.5013141248126995 0.1881065478350451 T T T
0.2389577607037103 0.2557853470202635 0.3119822854624507 T T T
0.250000000000000 0.2538200019999977 0.0679299979999968 F F F
0.2365172030239025 0.0147779605571467 0.1951207278316844 T T T
0.2755837072292026 0.7825470760466351 0.3179771980901581 T T T
0.750000000000000 0.7461799980000023 0.0640000029999968 F F F
0.7417930879271549 0.4950337976100427 0.1850652498812949 T T T
0.7463186690716226 0.2585433169726084 0.3109978281760530 T T T
0.750000000000000 0.2538200019999977 0.0679299979999968 F F F
0.7373276077851877 0.0147444318722892 0.1942133275774312 T T T
0.7387680982002294 0.7924118291368321 0.3230651557890795 T T T
0.250000000000000 0.625000000000000 0.0018099999999990 F F F
0.250000000000000 0.375000000000000 0.1301199939999975 F F F
0.2524593310453009 0.1335406453016220 0.2579461507831032 T T T
0.250000000000000 0.8785200120000027 0.0036100000000019 F F F
0.250000000000000 0.6285200120000027 0.1319299939999965 F F F
0.2530418870718735 0.3728433042166133 0.2581128457014120 T T T
0.000000000000000 0.7535200120000027 0.0677699969999992 F F F
0.0022393752559679 0.5087319192209178 0.1960985961535425 T T T
0.0167386669263809 0.2579031665168529 0.3324132094793794 T T T
0.250000000000000 0.3714799879999973 0.000000000000000 F F F
0.250000000000000 0.1214800030000021 0.1283199940000017 F F F
0.2539072281153140 0.8743554403589208 0.2530410996606943 T T T
0.000000000000000 0.2464800030000021 0.0641599969999973 F F F
0.0064932126529043 -0.0011093428809063 0.1909187428939882 T T T
-0.0087863554399396 0.7647422155655157 0.3339025047652315 T T T
0.750000000000000 0.625000000000000 0.0018099999999990 F F F
0.750000000000000 0.375000000000000 0.1301199939999975 F F F
0.7538827377433083 0.1380768048027713 0.2557595606668756 T T T
0.750000000000000 0.8785200120000027 0.0036100000000019 F F F
0.750000000000000 0.6285200120000027 0.1319299939999965 F F F
0.7602132066650027 0.3849892641707486 0.2601632646313686 T T T
0.500000000000000 0.7535200120000027 0.0677699969999992 F F F
0.5107233053501650 0.5081986839205813 0.1975189861171902 T T T
0.5268977566009269 0.2603000136624253 0.3324997431455989 T T T
0.750000000000000 0.3714799879999973 0.000000000000000 F F F

```

|                    |                     |                    |   |   |   |
|--------------------|---------------------|--------------------|---|---|---|
| 0.7500000000000000 | 0.1214800030000021  | 0.1283199940000017 | F | F | F |
| 0.7508642984536056 | 0.8605823479490829  | 0.2508079702033597 | T | T | T |
| 0.5000000000000000 | 0.2464800030000021  | 0.0641599969999973 | F | F | F |
| 0.5082642452881369 | -0.0005832728244736 | 0.1908166726232177 | T | T | T |
| 0.5034632612004721 | 0.7685424060158391  | 0.3288875801143891 | T | T | T |
| 0.2500000000000000 | 0.1250000000000000  | 0.0018099999999990 | F | F | F |
| 0.2500000000000000 | 0.8750000000000000  | 0.1301199939999975 | F | F | F |
| 0.7500000000000000 | 0.1250000000000000  | 0.0018099999999990 | F | F | F |
| 0.7500000000000000 | 0.8750000000000000  | 0.1301199939999975 | F | F | F |
| 0.3462078652306361 | 0.5639115454461197  | 0.2930495626976903 | T | T | T |
| 0.6375723248480983 | 0.5795239857007769  | 0.3643143137416171 | T | T | T |
| 0.7548427515784955 | 0.5275148951815052  | 0.3100542759804678 | T | T | T |
| 0.1453036250641383 | 0.5742988365640747  | 0.2961809455704192 | T | T | T |
| 0.7545500352814211 | 0.8999765263295716  | 0.3768279542506568 | T | T | T |
| 0.8435570477374303 | 0.5863547502412305  | 0.3697080838729420 | T | T | T |
| 0.2267353623870477 | 0.8506008046458255  | 0.3868615069447572 | T | T | T |
| 0.0216481724764072 | 0.8218842399910010  | 0.3656348737709123 | T | T | T |
| 0.7448678847086168 | 0.5955305770458584  | 0.3409919445956587 | T | T | T |
| 0.2486150398232553 | 0.6150256838690881  | 0.2790064812277075 | T | T | T |

**Alternating mechanism (state 14)**

|                    |                     |                     |
|--------------------|---------------------|---------------------|
| 1.0000000000000000 |                     |                     |
| 8.0600004195999997 | 0.0000000000000000  | 0.0000000000000000  |
| 0.0000000000000000 | 11.3985996245999992 | 0.0000000000000000  |
| 0.0000000000000000 | 0.0000000000000000  | 22.2077999115000004 |

Ba Ti O H N  
8 12 30 12 2

Selective dynamics

Direct

|                     |                    |                    |   |   |   |
|---------------------|--------------------|--------------------|---|---|---|
| 0.0000000000000000  | 0.5000000000000000 | 0.0659599970000002 | F | F | F |
| 0.9967443060644902  | 0.2518350644158638 | 0.1915593948994747 | T | T | T |
| 0.0000000000000000  | 0.0000000000000000 | 0.0659599970000002 | F | F | F |
| -0.0007391649903767 | 0.7587062134544366 | 0.1903725627277884 | T | T | T |
| 0.5000000000000000  | 0.5000000000000000 | 0.0659599970000002 | F | F | F |
| 0.4967288224276080  | 0.2518007505215135 | 0.1915663660318677 | T | T | T |
| 0.5000000000000000  | 0.0000000000000000 | 0.0659599970000002 | F | F | F |
| 0.4992581860159350  | 0.7587136325474577 | 0.1903966215178604 | T | T | T |
| 0.2500000000000000  | 0.7461799980000023 | 0.0640000029999968 | F | F | F |
| 0.2408532999282539  | 0.4957622031158039 | 0.1852117899255498 | T | T | T |
| 0.2427417296503160  | 0.2623672148029424 | 0.3114258109946436 | T | T | T |
| 0.2500000000000000  | 0.2538200019999977 | 0.0679299979999968 | F | F | F |
| 0.2377286769356983  | 0.0148984415899886 | 0.1956123032564608 | T | T | T |
| 0.2673402535090247  | 0.8043089868327850 | 0.3245440973925733 | T | T | T |
| 0.7500000000000000  | 0.7461799980000023 | 0.0640000029999968 | F | F | F |
| 0.7408784333109265  | 0.4957541183733183 | 0.1852121666053179 | T | T | T |
| 0.7427421096295053  | 0.2623896568149603 | 0.3114288811573753 | T | T | T |
| 0.7500000000000000  | 0.2538200019999977 | 0.0679299979999968 | F | F | F |
| 0.7378006507732978  | 0.0149513142281042 | 0.1955968797357113 | T | T | T |
| 0.7677226985072979  | 0.8041919830719776 | 0.3245669200722391 | T | T | T |
| 0.2500000000000000  | 0.6250000000000000 | 0.0018099999999990 | F | F | F |
| 0.2500000000000000  | 0.3750000000000000 | 0.1301199939999975 | F | F | F |
| 0.2523781955023837  | 0.1419225762974310 | 0.2563941727258995 | T | T | T |
| 0.2500000000000000  | 0.8785200120000027 | 0.0036100000000019 | F | F | F |



|                     |                    |                    |   |   |   |
|---------------------|--------------------|--------------------|---|---|---|
| 0.2500000000000000  | 0.6285200120000027 | 0.1319299939999965 | F | F | F |
| 0.2585767142541532  | 0.3881102206385448 | 0.2604050109117242 | T | T | T |
| 0.0000000000000000  | 0.7535200120000027 | 0.0677699969999992 | F | F | F |
| 0.0077029501269580  | 0.5114666207294610 | 0.1978694461910706 | T | T | T |
| 0.0219673552066603  | 0.2641477936582075 | 0.3322373850921296 | T | T | T |
| 0.2500000000000000  | 0.3714799879999973 | 0.0000000000000000 | F | F | F |
| 0.2500000000000000  | 0.1214800030000021 | 0.1283199940000017 | F | F | F |
| 0.2504426574291561  | 0.8676178902012238 | 0.2495540808133456 | T | T | T |
| 0.0000000000000000  | 0.2464800030000021 | 0.0641599969999973 | F | F | F |
| 0.0061093699381824  | 0.0030860733023963 | 0.1916856489012657 | T | T | T |
| -0.0108495688166107 | 0.7783125377347025 | 0.3287913646118181 | T | T | T |
| 0.7500000000000000  | 0.6250000000000000 | 0.0018099999999990 | F | F | F |
| 0.7500000000000000  | 0.3750000000000000 | 0.1301199939999975 | F | F | F |
| 0.7523980526199209  | 0.1419435970718610 | 0.2563875205802095 | T | T | T |
| 0.7500000000000000  | 0.8785200120000027 | 0.0036100000000019 | F | F | F |
| 0.7500000000000000  | 0.6285200120000027 | 0.1319299939999965 | F | F | F |
| 0.7585813116586896  | 0.3881303098587867 | 0.2604478520541786 | T | T | T |
| 0.5000000000000000  | 0.7535200120000027 | 0.0677699969999992 | F | F | F |
| 0.5077596766786272  | 0.5115432373348817 | 0.1979156878688204 | T | T | T |
| 0.5219591446322608  | 0.2641239089692857 | 0.3322152943655307 | T | T | T |
| 0.7500000000000000  | 0.3714799879999973 | 0.0000000000000000 | F | F | F |
| 0.7500000000000000  | 0.1214800030000021 | 0.1283199940000017 | F | F | F |
| 0.7505436358914306  | 0.8675192366186874 | 0.2495873458558692 | T | T | T |
| 0.5000000000000000  | 0.2464800030000021 | 0.0641599969999973 | F | F | F |
| 0.5061856025950988  | 0.0030601587385305 | 0.1916916612688191 | T | T | T |
| 0.4888337176721432  | 0.7786797427179070 | 0.3288684693411399 | T | T | T |
| 0.2500000000000000  | 0.1250000000000000 | 0.0018099999999990 | F | F | F |
| 0.2500000000000000  | 0.8750000000000000 | 0.1301199939999975 | F | F | F |
| 0.7500000000000000  | 0.1250000000000000 | 0.0018099999999990 | F | F | F |
| 0.7500000000000000  | 0.8750000000000000 | 0.1301199939999975 | F | F | F |
| 0.2686972721494889  | 0.5914453344650652 | 0.3846394110589778 | T | T | T |
| 0.5927149705787672  | 0.6131488040699810 | 0.3456555406489494 | T | T | T |
| 0.7517753859640177  | 0.5404428283404169 | 0.3154885779618131 | T | T | T |
| 0.0940392006272571  | 0.6119457692678093 | 0.3462219627074046 | T | T | T |
| 0.7568477907893706  | 0.9138061267610019 | 0.3773403333203364 | T | T | T |
| 0.7658372024897332  | 0.5914013212246804 | 0.3847811868522603 | T | T | T |
| 0.2531024027734390  | 0.5405293639655977 | 0.3153946327939942 | T | T | T |
| 0.2563326588098336  | 0.9138858828751094 | 0.3773122899326174 | T | T | T |
| 0.7198504925508618  | 0.6101718053242862 | 0.3428948797408277 | T | T | T |
| 0.2211016015651258  | 0.6100066735396257 | 0.3429610496143257 | T | T | T |

**Alternating mechanism (state 15)**

Same as state 16 of distal mechanism

**Alternating mechanism (state 16)**

Same as state 17 of distal mechanism

**Alternating mechanism (state 17)**

Same as state 1 of distal mechanism
